# Supplementary material for: Suppression of cancer stemness p21-regulating mRNA and microRNA signatures in recurrent ovarian cancer patient samples
Source: J Ovarian Res. 2012 Jan 19;5:2. doi: 10.1186/1757-2215-5-2 (PMC3285047; doi:10.1186/1757-2215-5-2)
Supplement: Additional file 2 — Microarray and functional relationship analysis of early differentiation response of NULLI-SCC cells. This file contains genelists of genes upregulated and downregulated by NULLI-SCC cells in response to differentiation stimulus. This file also contains results of analysis to identify functional relationships between these genes. [file 1757-2215-5-2-S2.XLS]

## Sheet: Nulli-SCC Genelist
Note: Several genes have no entry for 'Gene Symbol' or 'Gene Name' as they have not been characterised to date
185 Upregulated genes						152 Downregulated genes
ProbeID	FC (diff/undiff)	p value	Gene_Symbol	Gene_Name		ProbeID	FC (diff/undiff)	p value	Gene_Symbol	Gene_Name
656417	13.953	0.0317297				844804	-6.25131	0.0466156
375804	12.3228	0.0117714				767916	-5.25793	0.0360948	Ssa2	Sjogren syndrome antigen A2
465651	8.9744	0.0160968				315512	-4.81794	0.00321337
594766	7.00339	0.0407133	Gpr173	G-protein coupled receptor 173		476557	-4.62026	0.013292	4930486G11Rik	RIKEN cDNA 4930486G11 gene
585125	6.66486	0.0176966				618303	-4.5374	0.0138255
711962	6.2969	0.0366799				664681	-4.50744	0.00748986	1700052K11Rik	RIKEN cDNA 1700052K11 gene
802185	6.1793	0.0168365				329908	-4.44627	0.0142602	Refbp2	RNA and export factor binding protein 2
532462	5.72457	0.0252437				738191	-4.2058	0.00377412
578931	5.37658	0.00775817	Olfr1411	olfactory receptor 1411		872960	-3.76503	8.72502e-05	2900011O08Rik	RIKEN cDNA 2900011O08 gene
827296	5.31301	0.00124784	Flt1	FMS-like tyrosine kinase 1		656188	-3.69948	0.0279595	B830009D23Rik	RIKEN cDNA B830009D23 gene
543504	5.02772	0.0223066	Npy5r	neuropeptide Y receptor Y5		591960	-3.64265	0.0350774	Tirap	toll-interleukin 1 receptor (TIR) domain-containing adaptor protein
790322	4.55979	0.00766915				811688	-3.54596	0.0353186	Defb13	defensin beta 13
553001	4.41859	0.029513	Olfr786	olfactory receptor 786		577869	-3.4052	0.000733487
511661	4.23621	0.0100793				933049	-3.39624	0.0455533	Es31	esterase 31
742969	4.06409	0.00966671	Fau	Finkel-Biskis-Reilly murine sarcoma virus (FBR-MuSV) ubiquitously expressed (fox derived)		348831	-3.37034	0.0468133
389989	4.01825	0.0133793				383386	-3.36931	0.000893822
813292	3.9191	0.0269149				355349	-3.28682	0.0259709	Nap1l5	nucleosome assembly protein 1-like 5
852251	3.8693	0.0139379				530549	-3.27595	0.00106885	Tekt2	tektin 2
544945	3.83606	0.0012526				637749	-3.25851	0.0115017
798526	3.746	0.0180079				861411	-3.23251	0.00401852	Dgcr8	DiGeorge syndrome critical region gene 8
504658	3.70379	0.0480162	Gm392	gene model 392, (NCBI)		330600	-3.21731	0.047127	Olfr1270	olfactory receptor 1270
348665	3.64086	0.0119421				465369	-3.18797	0.023347	Vmd2	vitelliform macular dystrophy 2 homolog (human)
641155	3.57747	0.0410489	na	similar to Zinc finger protein 510		522872	-3.17658	0.0222126	Hoxc6	homeo box C6
569386	3.5515	0.000732281				682480	-3.15217	0.000519593
697891	3.53846	0.00488431				393788	-3.11619	0.000196644	C130086A10	hypothetical protein C130086A10
715276	3.45445	0.00570817				725545	-3.05098	0.00579887	Cpne5	copine V
520660	3.4489	0.00827808				584543	-3.04016	0.0122212
878217	3.43308	0.0270395				359834	-2.98181	0.00192842	Prpf39	PRP39 pre-mRNA processing factor 39 homolog (yeast)
759886	3.42568	0.0286975				779858	-2.97126	0.0180842
681688	3.42153	0.00272694				831927	-2.9341	0.0239928
772436	3.32661	0.0356972				608848	-2.92292	0.0318549	Prr3	proline-rich polypeptide 3
528813	3.323	0.0105165				735694	-2.89079	0.0153686	Olfr360	olfactory receptor 360
699996	3.24817	0.00760907				842956	-2.88951	0.0348887	Gopc	golgi associated PDZ and coiled-coil motif containing
876218	3.2414	0.0367515	Gm449	gene model 449, (NCBI)		350696	-2.87562	0.0383758
445070	3.17286	0.0158688				747783	-2.82317	0.025607	MGC102419	similar to mNori-2p
894320	3.14037	0.00395664				416270	-2.80725	0.00346761	Arrdc5	arrestin domain containing 5
891786	3.13776	0.0152421				385469	-2.76503	0.00542361	St6galnac6	ST6 (alpha-N-acetyl-neuraminyl-2,3-beta-galactosyl-1,3)-N-acetylgalactosaminide alpha-2,6-sialyltransferase 6
588857	3.13363	0.00170305				420465	-2.74519	0.0166804	5730591J02Rik	RIKEN cDNA 5730591J02 gene
893020	3.10257	0.0312441				565024	-2.74393	0.0399664	Adrb2	adrenergic receptor, beta 2
870057	3.07109	0.0033907	Dnajb4	DnaJ (Hsp40) homolog, subfamily B, member 4		342931	-2.7184	0.00925063
878746	3.05214	0.000663435				726323	-2.71436	0.0456204	Slc15a1	solute carrier family 15 (oligopeptide transporter), member 1
815781	2.98169	0.00178952				536491	-2.71149	0.0336153	Cggbp1	CGG triplet repeat binding protein 1
710865	2.94092	0.0108875				620558	-2.67439	0.0246633	Smad1	MAD homolog 1 (Drosophila)
726269	2.92106	0.0083447				542103	-2.65171	0.0221489	Ifngr2	interferon gamma receptor 2
374833	2.91703	0.0419725	Loxl2	lysyl oxidase-like 2		510125	-2.64418	0.0197929
751976	2.8333	0.0471462				746384	-2.63103	0.0479506	Fadd	Fas (TNFRSF6)-associated via death domain
636139	2.81782	0.00952108				356393	-2.62612	0.0153655
347809	2.81213	0.00719477				584826	-2.62462	0.0059688
573938	2.8114	0.0373374				741587	-2.62272	0.0193811
465059	2.79142	0.0162493				732301	-2.59518	0.0282367
343308	2.78414	0.0173345	Aoc3	amine oxidase, copper containing 3		369017	-2.59322	0.000934599	4732496O08Rik	RIKEN cDNA 4732496O08 gene
899622	2.77703	0.00215329				309382	-2.5635	0.00370691
896871	2.77683	0.00684102				853782	-2.55896	0.028593
723421	2.75872	0.00305271	Serpini2	serine (or cysteine) proteinase inhibitor, clade I,member 1		711907	-2.5488	0.0324359	2310067E08Rik	RIKEN cDNA 2310067E08 gene
379273	2.73426	0.00369515				388577	-2.52382	0.0355078	A230050P20Rik	RIKEN cDNA A230050P20 gene
887038	2.72463	0.0450672	Olfr870	olfactory receptor 870		505568	-2.49548	0.000402803	D330017J20Rik	RIKEN cDNA D330017J20 gene
326700	2.71413	0.00530727				925906	-2.4896	0.0477334	Ren1	renin 1 structural
403724	2.69841	0.0176218				302463	-2.4871	0.000136849
895936	2.69341	0.0205803				723911	-2.48331	0.0350524
587585	2.67604	0.00485591				839331	-2.48286	0.00384997	Si	silver
892785	2.64603	0.0154771				805041	-2.47352	0.0205278	Cdh4	cadherin 4
669641	2.62685	0.0125296				841470	-2.46985	0.00893586
299559	2.62293	0.0297912				891890	-2.4578	0.0126642	Magea8	melanoma antigen, family A, 8
465788	2.59907	0.00199896	Egln3	EGL nine homolog 3 (C. elegans)		752450	-2.44943	0.00887982	Mtm1	X-linked myotubular myopathy gene 1
350009	2.59559	0.00393819	C330008K14Rik	RIKEN cDNA C330008K14 gene		337673	-2.44278	0.0344424	Kif2b	kinesin family member 2B
749471	2.59499	0.0149394				852049	-2.42122	0.0257394	Zfpn1a3	zinc finger protein, subfamily 1A, 3 (Aiolos)
439938	2.58934	0.0109053				648982	-2.42103	0.0376593
484584	2.58009	0.0145766				878061	-2.41156	0.0156001	4931433E08Rik	RIKEN cDNA 4931433E08 gene
425395	2.57523	0.0059789				802529	-2.39506	0.00735991	C330005M16Rik	RIKEN cDNA C330005M16 gene
429576	2.57337	0.00312709	Aldoc	aldolase 3, C isoform		595375	-2.39002	0.0209552
532009	2.56213	0.0265997				425448	-2.38761	0.000827872	na	gene model 526, (NCBI)
398992	2.55044	0.0217143				588610	-2.37521	0.00104765
734442	2.53894	0.0358233	Lgals7	lectin, galactose binding, soluble 7		408398	-2.37358	0.00309677	Cyr61	cysteine rich protein 61
558435	2.52919	0.00948201				901353	-2.36619	0.0184337
468211	2.52321	0.00905042	Ndrg2	N-myc downstream regulated gene 2		395475	-2.36618	0.00135124	Gpatc3	G patch domain containing 3
742595	2.516	0.0134025	Mat1a	methionine adenosyltransferase I, alpha		564117	-2.36213	0.0370491	8030462N17Rik	RIKEN cDNA 8030462N17 gene
738187	2.51525	0.00278136	Pak7	p21 (CDKN1A)-activated kinase 7		811535	-2.36138	0.0146876	Txndc1	thioredoxin domain containing 1
592921	2.51	0.00728463	Pfkp	phosphofructokinase, platelet		375837	-2.3594	0.00251845	Nkiras2	NFKB inhibitor interacting Ras-like protein 2
736123	2.50892	0.00658704				372502	-2.35921	0.00330403
380532	2.50282	0.00100478	Maff	v-maf musculoaponeurotic fibrosarcoma oncogene family, protein F (avian)		552874	-2.35883	0.00855537	2410080H04Rik	RIKEN cDNA 2410080H04 gene
886025	2.49774	0.0263273	Xlr	X-linked lymphocyte-regulated complex		885329	-2.35075	0.0151334	4933406J08Rik	RIKEN cDNA 4933406J08 gene
434632	2.48971	0.0142376	LOC434825	hypothetical gene supported by AK090266		509237	-2.34618	0.0186369	Zfp264	zinc finger protein 264
684760	2.46957	0.00172079				466429	-2.33438	0.00991248	Atp5g1	ATP synthase, H+ transporting, mitochondrial F0 complex, subunit c (subunit 9), isoform 1
597321	2.46397	0.0191338				585129	-2.33422	0.00241532	Zik1	zinc finger protein interacting with K protein 1
612750	2.46171	0.0102075	2410003A14Rik	RIKEN cDNA 2410003A14 gene		655456	-2.3148	0.00700571	Chad	chondroadherin
895303	2.45376	0.0043592	Ndufab1	NADH dehydrogenase (ubiquinone) 1, alpha/beta subcomplex, 1		579728	-2.31112	0.0023783	9630050M13Rik	RIKEN cDNA 9630050M13 gene
714523	2.45312	0.0284866				930772	-2.29986	0.00861603	Slc16a13	solute carrier family 16 (monocarboxylic acid transporters), member 13
700437	2.44972	0.0495765				494224	-2.28851	0.0202108	Olfr110	olfactory receptor 110
524692	2.44903	0.00559616	Fgf22	fibroblast growth factor 22		747509	-2.28576	0.00273528	Zfp386	zinc finger protein 386 (Kruppel-like)
462810	2.44196	0.000594556	C630041L24Rik	RIKEN cDNA C630041L24 gene		452235	-2.27535	0.0409524	2610016C23Rik	RIKEN cDNA 2610016C23 gene
726065	2.43686	0.0252011				909757	-2.26801	8.80884e-05
637754	2.42019	0.0432897	Mgst1	microsomal glutathione S-transferase 1		437412	-2.26651	0.0310874
903663	2.41616	0.00248434				625508	-2.26428	0.00298272	Camk1d	calcium/calmodulin-dependent protein kinase ID
300969	2.41488	0.00865903	LOC238564	similar to myosin light chain kinase		879693	-2.25808	0.00174317	Sgpl1	sphingosine phosphate lyase 1
355189	2.41223	0.00795276				456312	-2.25545	0.0401077
752566	2.38683	0.00233856	Olfr629	olfactory receptor 629		808791	-2.25234	0.0361858	E430034L04Rik	RIKEN cDNA E430034L04 gene
428214	2.3793	0.0195088				900030	-2.24762	0.0249386	na	similar to TATA box-binding protein-associated factor, RNA polymerase II, K, 18kD
417879	2.37714	0.00893448	Olfr1408	olfactory receptor 1408		345019	-2.24599	0.0477181	Stambp	Stam binding protein
854101	2.37176	0.00253795	B230308G19Rik	RIKEN cDNA B230308G19 gene		660642	-2.23605	0.0340485	2610009I02Rik	RIKEN cDNA 2610009I02 gene
673784	2.36519	0.0422155				396981	-2.23365	0.0353726
803015	2.35794	0.00138014	A2m	alpha-2-macroglobulin		388026	-2.22045	0.00950103
477049	2.35011	0.0437692				410414	-2.21899	0.0317256
700419	2.34931	0.0084285	C76566	expressed sequence C76566		635689	-2.21313	0.0214128	Cct6b	chaperonin subunit 6b (zeta)
588822	2.34772	0.00411308				360274	-2.20507	0.000306692	Cask	calcium/calmodulin-dependent serine protein kinase (MAGUK family)
406473	2.34662	0.00922743				769649	-2.20373	0.0112228
342091	2.33544	0.0210438				801889	-2.20107	0.0217623	Krtap13-1	keratin associated protein 13-1
859777	2.33466	0.0431767				495958	-2.20025	0.0448302
321945	2.32322	0.0365605	Olfr675	olfactory receptor 675		450327	-2.1962	0.00051288	na	similar to RIKEN cDNA 2600013N14
760410	2.30742	0.00601257				772549	-2.19464	0.0111931
618834	2.30092	0.00566268				804439	-2.18854	0.000379871	Apom	apolipoprotein M
858933	2.29651	0.00626279	Gpr6	G protein-coupled receptor 6		891392	-2.18197	0.00892793	Ndufa4	NADH dehydrogenase (ubiquinone) 1 alpha subcomplex, 4
838509	2.28929	0.00511703	5730485H21Rik	RIKEN cDNA 5730485H21 gene		485816	-2.16727	0.0167629	Nck1	non-catalytic region of tyrosine kinase adaptor protein 1
539745	2.27134	0.00186459	Abpg	androgen binding protein gamma		587662	-2.16712	0.0461035
615360	2.27045	0.0185771				619799	-2.16233	0.0322325	9630046K23Rik	RIKEN cDNA 9630046K23 gene
455295	2.26065	0.0132137	3110057O12Rik	RIKEN cDNA 3110057O12 gene		353919	-2.1578	0.00715911	Mjd	Machado-Joseph disease (spinocerebellar ataxia 3, olivopontocerebellar ataxia 3, autosomal dominant, ataxin 3) homolog (human)
900797	2.25625	0.0032547				529495	-2.15051	0.0115087
298936	2.24523	0.0160638				312791	-2.14588	0.0330872	Slc30a7	solute carrier family 30 (zinc transporter), member 7
886516	2.24352	0.00076152				349496	-2.14453	0.0102477	Gem	GTP binding protein (gene overexpressed in skeletal muscle)
873703	2.23953	0.0341185	Rgs12	regulator of G-protein signaling 12		661927	-2.13815	0.0255371	Pak6	p21 (CDKN1A)-activated kinase 6
779835	2.23776	0.00624135	Prss18	protease, serine, 18		693933	-2.13775	0.00809804	Dclre1b	DNA cross-link repair 1B, PSO2 homolog (S. cerevisiae)
794754	2.2341	0.0462448				490758	-2.13101	0.000443654	Pet112l	PET112-like (yeast)
721885	2.23326	0.0209963	Olfr313	olfactory receptor 313		498001	-2.12394	0.00522249	na	gene model 719, (NCBI)
685710	2.22921	0.0392044				316681	-2.12329	0.00732113
624236	2.22869	0.00690042				837915	-2.1195	0.0302955	6530411B15Rik	RIKEN cDNA 6530411B15 gene
777053	2.22804	0.0338787				546762	-2.11182	0.0272197
869571	2.22562	0.00485451	Bhlhb2	basic helix-loop-helix domain containing, class B2		304111	-2.11022	0.00305256	9630015D15Rik	RIKEN cDNA 9630015D15 gene
750558	2.22216	0.0480794	4932415M13	hypothetical protein 4932415M13		892085	-2.11022	0.00536927
733908	2.21606	0.0167164	Elavl3	ELAV (embryonic lethal, abnormal vision, Drosophila)-like 3 (Hu antigen C)		736218	-2.10547	0.00195904	Ppt1	palmitoyl-protein thioesterase 1
578660	2.2045	0.0184125				777713	-2.1006	0.033275	Wars	tryptophanyl-tRNA synthetase
700762	2.20224	0.049873	Tcfcp2l3	transcription factor CP2-like 3		488654	-2.08749	0.0162113	D330012D11Rik	RIKEN cDNA D330012D11 gene
846625	2.20013	0.0214802				364516	-2.08605	0.0112876	Slc35a3	solute carrier family 35 (UDP-N-acetylglucosamine (UDP-GlcNAc) transporter), member 3
432405	2.19872	0.0103118				697073	-2.0855	0.0236556	Golga5	golgi autoantigen, golgin subfamily a, 5
659007	2.19335	0.0451051	B930086A06Rik	RIKEN cDNA B930086A06 gene		881225	-2.08462	0.0427934	AU044757	expressed sequence AU044757
481403	2.19174	0.041688				471528	-2.08104	0.0235649	Fbxo17	F-box protein 17
354452	2.19074	0.00440266				656351	-2.07751	0.00853128
519325	2.1895	0.0468153				896311	-2.07606	0.0492175	Rfwd2	ring finger and WD repeat domain 2
361012	2.17759	0.00335822	Lef1	lymphoid enhancer binding factor 1		615742	-2.07534	0.00467738	Olfr1350	olfactory receptor 1350
882550	2.17481	0.0445233				914381	-2.06856	0.0205818	Nt5c2l1	5'-nucleotidase, cytosolic II-like 1
333605	2.17368	0.000643852	Bnip3	BCL2/adenovirus E1B 19kDa-interacting protein 1, NIP3		837857	-2.06255	0.0355258	Sytl1	synaptotagmin-like 1
896569	2.17263	0.00147249				703109	-2.06038	0.018727	9030420J04Rik	RIKEN cDNA 9030420J04 gene
489972	2.17142	0.0177343	Olfr70	olfactory receptor 70		793884	-2.0541	0.0041373	D330050I23Rik	RIKEN cDNA D330050I23 gene
520661	2.16236	0.048509				643978	-2.0494	0.0010407	MGC67181	Unknown (protein for MGC:67181)
853912	2.15868	0.0399032				397812	-2.04358	0.015626	2010004A03Rik	RIKEN cDNA 2010004A03 gene
411009	2.15373	0.0426023				535523	-2.0389	0.0421477
572843	2.14919	0.00190824	Hoxb3	homeo box B3		618695	-2.02711	0.0315394	Dner	delta/notch-like EGF-related receptor
310139	2.14638	0.0126472				392857	-2.0185	0.0042943	Cth	cystathionase (cystathionine gamma-lyase)
844593	2.13989	0.0270351	Olfr871	olfactory receptor 871		686004	-2.01739	0.00556655
900421	2.12999	0.0145199				563662	-2.0161	0.0287899	Stau2	staufen (RNA binding protein) homolog 2 (Drosophila)
829820	2.12835	0.0182276				637629	-2.01451	0.0380767	Suox	sulfite oxidase
832879	2.12338	0.00817559	na	similar to Cytochrome P450 2J3 (CYPIIJ3)		860567	-2.0129	0.0382889
747120	2.12176	0.0176365	Ltbr	lymphotoxin B receptor		770978	-2.00911	0.0029177	Cd38	CD38 antigen
455116	2.1094	0.0113502				555087	-2.0001	0.00101376
460586	2.10703	0.00486512
708987	2.1048	0.0317806	2300003C06Rik	RIKEN cDNA 2300003C06 gene
582243	2.10308	0.0301243	C330048F19	hypothetical protein C330048F19
918510	2.09952	0.00137319	Wif1	Wnt inhibitory factor 1
866152	2.09868	0.00140287
818491	2.09846	0.00819428
333244	2.09786	0.0107461
628730	2.09057	0.0146167	Rnf41	ring finger protein 41
476913	2.08663	0.00257929
652059	2.0857	0.0484695
847317	2.08234	0.00653515	Myod1	myogenic differentiation 1
761822	2.08144	0.00213873
896121	2.06914	0.0361166
553425	2.06809	0.024953	2810043G13Rik	RIKEN cDNA 2810043G13 gene
870672	2.06696	0.0207974
447264	2.06478	0.0339113	Ctsw	cathepsin W
461806	2.05653	0.000271274	Cd79a	CD79A antigen (immunoglobulin-associated alpha)
393194	2.0526	0.00232297
915478	2.0294	0.0160423	Slc16a3	solute carrier family 16 (monocarboxylic acid transporters), member 3
621080	2.02776	0.000387205
652637	2.02754	0.0463822
397553	2.02539	0.0210583	Naalad2	N-acetylated alpha-linked acidic dipeptidase 2
633652	2.02462	0.0369967
572373	2.01624	0.0294088	Slc5a9	solute carrier family 5 (sodium/glucose cotransporter), member 9
466202	2.01299	0.0470923
395125	2.01248	0.0465715	na	similar to KAT protein
921400	2.00845	0.0359618
771084	2.00243	0.0145586
457910	2.00098	0.0282975
349572	2.00086	0.00025173	Pygl	liver glycogen phosphorylase
409769	2.00067	0.0189839
541291	2.00028	0.018394
420577	2.00027	0.0431353

## Sheet: Functional Group Analysis
Genes Upregulated during Nulli-SCC Differentiation					Genes Downregulated during Nulli-SCC Differentiation
Biological Process	Count	P-Value	Benjamini		Biological Process	Count	P-Value	Benjamini
Cell surface receptor linked signal transduction	16	0.0037	0.78		Regulation of growth	5	0.016	1
Multicellular organismal process	21	0.014	0.95		Localization	18	0.017	1
Sensory perception of smell	9	0.015	0.88		Cellular process	43	0.031	1
G-protein coupled receptor protein signaling pathway	12	0.018	0.84		Regulation of cell growth	3	0.048	1
Sensory perception of chemical stimulus	9	0.022	0.83		Positive regulation of developmental growth	2	0.048	1
Neurological system process	11	0.022	0.78		Transport	15	0.051	1
System process	11	0.035	0.88		Establishment of localization	15	0.054	1
Generation of precursor metabolites and energy	4	0.042	0.89		Regulation of systemic arterial blood pressure mediated by a chemical signal	2	0.073	1
Sensory perception	9	0.05	0.9		Cellular metabolic process	29	0.074	1
Glucose metabolic process	3	0.064	0.93		Receptor-mediated endocytosis	2	0.077	1
Cognition	9	0.065	0.92		Metabolic process	33	0.093	1
Hexose metabolic process	3	0.089	0.96
Signal transduction	13	0.092	0.95		Molecular Function	Count	P-Value	Benjamini
					Neurexin binding	2	0.024	0.99
Molecular Function	Count	P-Value	Benjamini		Symporter activity	3	0.078	1
Transmembrane receptor activity	15	0.00081	0.11		Lyase activity	3	0.092	1
Molecular transducer activity	17	0.003	0.19
Signal transducer activity	17	0.003	0.19		No Pathway Associations
Receptor activity	16	0.0034	0.15
G-protein coupled receptor activity	12	0.0064	0.21
Olfactory receptor activity	9	0.012	0.29
Vitamin binding	3	0.045	0.66
Oxidoreductase activity, acting on the CH-NH2 group of donors, oxygen as acceptor	2	0.049	0.64
Oxidoreductase activity, acting on the CH-NH2 group of donors	2	0.057	0.65
RNA polymerase II transcription factor activity, enhancer binding	2	0.081	0.73
