# Supplementary material for: Suppression of cancer stemness p21-regulating mRNA and microRNA signatures in recurrent ovarian cancer patient samples
Source: J Ovarian Res. 2012 Jan 19;5:2. doi: 10.1186/1757-2215-5-2 (PMC3285047; doi:10.1186/1757-2215-5-2)
Supplement: Additional file 4 — Microarray and functional relationship analysis of primary versus recurrent tumor samples. This file contains genelists of genes upregulated and downregulated in primary versus recurrent tumor samples. This file also contains results of analysis to identify functional relationships between these genes. [file 1757-2215-5-2-S4.XLS]

## Sheet: Cohort 1
Note: Several genes have no entry for 'Gene Symbol' or 'Gene Name' as they have not been characterised to date
850 Genes Upregulated in Primary vs Recurrent Tumours (Cohort 1)						498 Genes Downregulated in Primary vs Recurrent (Cohort 1)
ProbeID	FC (prim/recur)	p value	Gene_Symbol	Gene_Name		ProbeID	FC (prim/recur)	p value	Gene_Symbol	Gene_Name
696887	11.2549	0.010491	LOC388638			150137	-23.3281	0.0158314	FABP4	fatty acid binding protein 4, adipocyte
174198	9.69191	0.00779557	RPESP			152152	-12.2469	0.0123179	PRG4	proteoglycan 4
157994	9.19031	0.00424024				163630	-11.3568	0.00687187	CLDN16	claudin 16
155606	9.02982	1.78494e-05	LASS4	LAG1 longevity assurance homolog 4 (S. cerevisiae)		228243	-7.32756	0.0124803	ZNF429	zinc finger protein 429
109319	8.71189	0.0304485	PCP4	Purkinje cell protein 4		157338	-7.1502	0.0160961	RARRES1	retinoic acid receptor responder (tazarotene induced) 1
204066	8.36668	0.030715	SPAG11	sperm associated antigen 11		200584	-6.67725	0.000125574	POTE14|P704P|ACTBL1	actin, beta-like 1
202780	8.01168	0.00769157	ADM	adrenomedullin		115632	-6.61029	0.026359	CACNA1G	calcium channel, voltage-dependent, alpha 1G subunit
187241	7.7981	0.00102167	KLHDC8A	kelch domain containing 8A		547559	-6.52672	0.00214137	PRKCBP1	protein kinase C binding protein 1
100295	7.19212	0.0351179	CRABP1	cellular retinoic acid binding protein 1		183788	-6.37137	0.0203392	LOC130576
205375	7.06626	0.00263125	RDHE2			189318	-6.36806	0.00154623
197208	6.81951	0.0169977	LMO3	LIM domain only 3 (rhombotin-like 2)		127094	-6.03752	0.00432529	AADACL1	arylacetamide deacetylase-like 1
141874	6.7835	0.0146734	TMSL8	thymosin-like 8		108260	-5.9005	0.017559
131899	6.59939	0.0133769	DACH1	dachshund homolog 1 (Drosophila)		519015	-5.87148	0.0086757
149049	6.43643	0.00362203	FBLN1	fibulin 1		112201	-5.85175	0.0453809	ADH1C	alcohol dehydrogenase 1C (class I), gamma polypeptide
152127	6.36012	0.0372649	QPCT	glutaminyl-peptide cyclotransferase (glutaminyl cyclase)		218004	-5.43348	0.0169517	TUSC5	tumor suppressor candidate 5
182524	6.30805	0.0350495	NRN1	neuritin 1		235386	-5.36645	0.0158187
132032	6.23713	0.00162364	ACTG2	actin, gamma 2, smooth muscle, enteric		114188	-5.3518	0.00103222	S100B	S100 calcium binding protein, beta (neural)
203713	6.09296	0.0134583	LOC401115			219817	-5.21222	0.0133657	HOXD4	homeobox D4
115998	6.03405	4.25796e-05	STARD10	START domain containing 10		173408	-5.19235	0.0079553	CXCL2	chemokine (C-X-C motif) ligand 2
133505	6.01149	0.0275606	C9orf61	chromosome 9 open reading frame 61		683116	-5.14773	0.00223701
167316	5.80873	0.0157192	MATN2	matrilin 2		190681	-5.12211	0.0251516
117334	5.79402	0.000757472	PHLDA3	pleckstrin homology-like domain, family A, member 3		133475	-5.08001	0.00406546	KRTAP3-1	keratin associated protein 3-1
137165	5.70682	0.000398154	CSRP2	cysteine and glycine-rich protein 2		207059	-5.04279	0.0204326	PDCL2	phosducin-like 2
124513	5.68057	0.000299904	C1orf88	chromosome 1 open reading frame 88		123744	-5.01342	0.00768553	PTX3	pentraxin-related gene, rapidly induced by IL-1 beta
133973	5.5873	0.011442	SULT1C1	sulfotransferase family, cytosolic, 1C, member 1		127488	-5.00989	0.0276808	C10orf81	chromosome 10 open reading frame 81
173221	5.5822	0.00930871	LAMA1	laminin, alpha 1		201691	-4.99618	2.97927e-05
102700	5.53775	0.0466212	FAM84A	family with sequence similarity 84, member A		131599	-4.92527	0.0420192	CDH23	cadherin-like 23
209676	5.47615	0.00445109	SDC2	syndecan 2 (heparan sulfate proteoglycan 1, cell surface-associated, fibroglycan)		498878	-4.91938	0.0126653
228477	5.33715	0.0205689	ADCY1	adenylate cyclase 1 (brain)		192657	-4.87222	0.0189957
114335	5.33089	0.0263424	EFHD1	EF-hand domain family, member D1		176032	-4.85589	0.0076387	TM4SF1	transmembrane 4 L six family member 1
123150	5.31911	0.00472404	ATP8A2	ATPase, aminophospholipid transporter-like, Class I, type 8A, member 2		183774	-4.83199	0.0464193	TNFRSF17	tumor necrosis factor receptor superfamily, member 17
184681	5.28491	0.00136298	PIGM	phosphatidylinositol glycan, class M		122135	-4.70674	0.00969338	PLIN	perilipin
211573	5.24201	0.00388942	NPTX2	neuronal pentraxin II		157022	-4.67743	0.00152857	PLAC8	placenta-specific 8
116132	5.23177	0.00241736	PLN	phospholamban		116539	-4.59518	0.02051
188590	5.17516	0.035903	ZCCHC12	zinc finger, CCHC domain containing 12		106161	-4.5932	0.0245021	SYP	synaptophysin
199358	5.12666	0.0245046	ELOVL4	elongation of very long chain fatty acids (FEN1/Elo2, SUR4/Elo3, yeast)-like 4		10546171	-4.30183	0.000496003
183211	5.10683	0.003597	PHYH	phytanoyl-CoA 2-hydroxylase		515759	-4.14271	0.0492378
160257	4.97209	0.00893055	DDIT4	DNA-damage-inducible transcript 4		205124	-4.113	0.0319186	CP	ceruloplasmin (ferroxidase)
119453	4.92515	0.0338193	STC1	stanniocalcin 1		101762	-4.07669	0.0198104	PRAME	preferentially expressed antigen in melanoma
173805	4.88285	0.000684111				224495	-4.0303	0.0154954
215065	4.8766	0.000322854	RNPC1	RNA-binding region (RNP1, RRM) containing 1		187709	-3.9936	0.000954739	2010-04-02
149921	4.87233	0.00436623	RBP1	retinol binding protein 1, cellular		235777	-3.95819	0.0292419	CTAGE4|LOC442780	CTAGE family, member 4
145013	4.85924	0.000592708	ARFRP1	ADP-ribosylation factor related protein 1		231094	-3.8808	0.0118719	LOC402573
210225	4.79198	0.0113769	PHGDH	phosphoglycerate dehydrogenase		130323	-3.87836	0.00527572	LAX1	lymphocyte transmembrane adaptor 1
186730	4.76681	0.00483966	KREMEN2	kringle containing transmembrane protein 2		171943	-3.86592	0.0203452	AK5	adenylate kinase 5
125359	4.71879	0.00795958	NUDT11	nudix (nucleoside diphosphate linked moiety X)-type motif 11		175139	-3.83571	0.00810143
174810	4.68564	0.00537147	ESM1	endothelial cell-specific molecule 1		430390	-3.82189	0.0417357	RLN3R2	relaxin 3 receptor 2
135778	4.68317	0.00322971	BOK	BCL2-related ovarian killer		198848	-3.7543	0.00194067	KIAA0460	KIAA0460
150554	4.61771	0.00149144	SMYD3	SET and MYND domain containing 3		164167	-3.73374	0.0123164
203030	4.59405	0.0116288	TUBB2B	tubulin, beta 2B		155932	-3.72121	0.000165123
151472	4.57129	0.0322778	OXCT1	3-oxoacid CoA transferase 1		529964	-3.6952	0.0222378	KIAA1786
151660	4.54608	0.00509461	MGC34830			157207	-3.68721	0.00128503	LOC154761|FLJ40722
228381	4.54163	0.00264685	LOC391819			118831	-3.67779	0.0142189	PDF
182404	4.51951	0.0378448	GDF15	growth differentiation factor 15		206456	-3.61034	0.00765026	TMTC1	transmembrane and tetratricopeptide repeat containing 1
187019	4.51876	0.0398226	AKR1B10	aldo-keto reductase family 1, member B10 (aldose reductase)		111161	-3.59135	0.000929566
106856	4.46544	0.00338879	SLC22A16	solute carrier family 22 (organic cation transporter), member 16		188172	-3.57838	0.0217904	SLC5A1	solute carrier family 5 (sodium/glucose cotransporter), member 1
204650	4.46175	0.0146346	HS3ST2	heparan sulfate (glucosamine) 3-O-sulfotransferase 2		231872	-3.57663	0.0175128	LOC286149
154907	4.46151	0.00560229	CTGF	connective tissue growth factor		592040	-3.56863	0.010023
143978	4.42142	0.000350393	CASK	calcium/calmodulin-dependent serine protein kinase (MAGUK family)		114371	-3.56709	0.047114	SELP	selectin P (granule membrane protein 140kDa, antigen CD62)
232774	4.38212	0.00770598				178869	-3.55662	0.0260096	GPR135	G protein-coupled receptor 135
193986	4.34354	0.0236605	STRA6	stimulated by retinoic acid gene 6 homolog (mouse)		142977	-3.47414	0.004093
102241	4.32653	0.0283135	ITGBL1	integrin, beta-like 1 (with EGF-like repeat domains)		137785	-3.45783	0.0420831	SP140	SP140 nuclear body protein
138911	4.32494	0.0448367	PCDHB6	protocadherin beta 6		161328	-3.42518	4.21673e-05	MGC2848
195002	4.3241	0.0332695	CA8	carbonic anhydrase VIII		108279	-3.41785	0.0434198	MPPED2	metallophosphoesterase domain containing 2
118398	4.32071	0.000140189	WASF1	WAS protein family, member 1		112586	-3.41261	0.0315134	LGALS2	lectin, galactoside-binding, soluble, 2 (galectin 2)
148364	4.26266	0.00260126	GPRC5B	G protein-coupled receptor, family C, group 5, member B		229198	-3.40368	0.00606736	MGC51025|FLJ40244
162854	4.26253	0.000185069	FLJ14213			187607	-3.40136	0.0389841
151061	4.25812	0.00348513	YIPF5	Yip1 domain family, member 5		133491	-3.38625	0.0114544	KLK13	kallikrein 13
128369	4.23518	0.000246718	PVRL2	poliovirus receptor-related 2 (herpesvirus entry mediator B)		483986	-3.35323	0.0144068
198483	4.19436	0.00161611	INA	internexin neuronal intermediate filament protein, alpha		128616	-3.34516	0.0113986
200619	4.18435	0.00635369	LIPG	lipase, endothelial		123795	-3.33679	0.0108637
203644	4.18177	0.000113881	DKK3	dickkopf homolog 3 (Xenopus laevis)		191139	-3.32228	0.0132629	OR2L2	olfactory receptor, family 2, subfamily L, member 2
169292	4.17325	0.00955265	NAP1L3	nucleosome assembly protein 1-like 3		148692	-3.32117	0.00280579	KIAA1026
186405	4.13616	0.000245073	MGAT4B	mannosyl (alpha-1,3-)-glycoprotein beta-1,4-N-acetylglucosaminyltransferase, isozyme B		237087	-3.3157	0.0148028
185853	4.12687	9.4914e-05	LGALS3BP	lectin, galactoside-binding, soluble, 3 binding protein		703394	-3.30302	0.0106447	GPRC5C	G protein-coupled receptor, family C, group 5, member C
218017	4.10713	0.013925	TSLP			221066	-3.24507	0.00149825
111851	4.04234	0.0269687	FLJ20701			182589	-3.23962	0.00322513	ANKRD15	ankyrin repeat domain 15
157084	4.02345	0.00874382	ERBB3	v-erb-b2 erythroblastic leukemia viral oncogene homolog 3 (avian)		230438	-3.21529	0.0146856
194763	3.98662	0.00160141	YIF1B	Yip1 interacting factor homolog B (S. cerevisiae)		232304	-3.19946	0.0283278
180764	3.98503	0.0116621	H2AFY2	H2A histone family, member Y2		235383	-3.191	0.0139802	LOC390712
110889	3.9745	2.87667e-05	PACSIN3	protein kinase C and casein kinase substrate in neurons 3		205575	-3.19019	5.50522e-05	DGCR8	DiGeorge syndrome critical region gene 8
135139	3.97044	0.00163107	RNF25	ring finger protein 25		158846	-3.1886	0.0210058	GPR171	G protein-coupled receptor 171
121618	3.97041	0.00114209	KCNMB4	potassium large conductance calcium-activated channel, subfamily M, beta member 4		226129	-3.18114	0.0024053	MRGPRX3	MAS-related GPR, member X3
138890	3.90089	0.00313739	PPL	periplakin		124789	-3.17296	0.000963047
131475	3.88773	0.00157145	PRSS8	protease, serine, 8 (prostasin)		236719	-3.1728	0.0491334
161022	3.88544	0.0120716	SCRN2	secernin 2		112559	-3.15709	0.000301002
199871	3.8699	0.0249126	CYP39A1	cytochrome P450, family 39, subfamily A, polypeptide 1		170576	-3.15384	0.000750566	LOC402169|LOC401121|LOC402170|LOC402168|LOC402166|LOC402165|LOC402167|DUB3
157685	3.86178	0.000699414	UBE1C	ubiquitin-activating enzyme E1C (UBA3 homolog, yeast)		190897	-3.14578	0.0295009
182475	3.82679	0.00259025	TRIM7	tripartite motif-containing 7		10423512	-3.14014	0.00854896
133690	3.81485	0.0104729	OSR2	odd-skipped related 2 (Drosophila)		153907	-3.13468	0.0404636	GPD2	glycerol-3-phosphate dehydrogenase 2 (mitochondrial)
160510	3.78422	0.00383754	TCN2	transcobalamin II; macrocytic anemia		181595	-3.12565	0.00147813	OR10A2	olfactory receptor, family 10, subfamily A, member 2
141279	3.77501	0.0245011	WNT6	wingless-type MMTV integration site family, member 6		141660	-3.1168	0.0391031
208646	3.76862	0.000609917	PLA2G10	phospholipase A2, group X		384686	-3.10584	0.0112146
202586	3.76842	0.0114725	ENTPD3	ectonucleoside triphosphate diphosphohydrolase 3		715431	-3.10259	0.0088011
194494	3.75354	0.0105052	LOC441570			142330	-3.07475	0.0444649
169853	3.75231	0.0060051	NKX3-1	NK3 transcription factor related, locus 1 (Drosophila)		101645	-3.07111	0.00635874	LOC93349
212859	3.74147	0.00101273	MGC13159			151761	-3.05703	0.0273279	C9orf57	chromosome 9 open reading frame 57
208277	3.71407	0.00502101	ADFP	adipose differentiation-related protein		114538	-3.0426	0.0297806	POLR1B	polymerase (RNA) I polypeptide B, 128kDa
164787	3.71378	0.0130925	CSPG5	chondroitin sulfate proteoglycan 5 (neuroglycan C)		182294	-3.01706	0.0109609	CACNA1C	calcium channel, voltage-dependent, L type, alpha 1C subunit
200774	3.708	0.000922996	NONO	non-POU domain containing, octamer-binding		174752	-3.00909	0.0159668
199889	3.68368	0.0193267	ODZ4	odz, odd Oz/ten-m homolog 4 (Drosophila)		710187	-2.99697	0.0090421	LOC440565|PRAMEF10|LOC441870	PRAME family member 10
194271	3.68362	0.00240447	TMPRSS2	transmembrane protease, serine 2		142125	-2.98826	0.0376742
111134	3.67976	0.0013481	THOC3	THO complex 3		115390	-2.98797	0.0306509	APOC2	apolipoprotein C-II
111334	3.66966	0.00344727	LAMC3	laminin, gamma 3		138852	-2.97306	0.00684916	DKFZP564O0823
206176	3.66758	0.0352759	EYA2	eyes absent homolog 2 (Drosophila)		232589	-2.96288	0.00795199
215924	3.6531	0.0467844	MRPS16	mitochondrial ribosomal protein S16		127863	-2.96019	0.0243705	C21orf96	chromosome 21 open reading frame 96
107931	3.6325	0.00664181	SH3YL1	SH3 domain containing, Ysc84-like 1 (S. cerevisiae)		228955	-2.94546	0.00322296
190997	3.62227	5.2999e-05	CGRRF1	cell growth regulator with ring finger domain 1		229790	-2.93586	0.000668241
203374	3.61258	0.0340638	GPR143	G protein-coupled receptor 143		206220	-2.9294	0.0246453	MT1M	metallothionein 1M
135983	3.60962	0.00359866	WDR61	WD repeat domain 61		152134	-2.92723	0.0306068	ATHL1	ATH1, acid trehalase-like 1 (yeast)
119386	3.60745	0.0177809	PLEKHB1	pleckstrin homology domain containing, family B (evectins) member 1		545513	-2.91219	0.0326125	IGFL1
190326	3.60731	0.0382849	CYS1	cystin 1		10546117	-2.90556	0.00223627
217858	3.60399	0.024622	RNF152	ring finger protein 152		195893	-2.90494	0.00074271	LOC112703
188985	3.59678	5.92636e-05	RRM2B	ribonucleotide reductase M2 B (TP53 inducible)		200916	-2.9011	0.00891121	RPL21	ribosomal protein L21
181362	3.58747	0.0101543	RKHD2	ring finger and KH domain containing 2		134553	-2.89578	0.0131659
155439	3.57495	0.00167793	HOMER3	homer homolog 3 (Drosophila)		127127	-2.88726	0.000127213	CACNA1D	calcium channel, voltage-dependent, L type, alpha 1D subunit
123271	3.564	0.0067615	LOC57146			213565	-2.88562	0.0138055
110557	3.54691	0.00477266	FXYD6	FXYD domain containing ion transport regulator 6		134061	-2.87732	0.0371673	DCDC2	doublecortin domain containing 2
148299	3.53617	0.000110843	WDR25	WD repeat domain 25		160454	-2.87623	0.0179055	SMC4L1	SMC4 structural maintenance of chromosomes 4-like 1 (yeast)
141176	3.51999	0.000479587	PERP	PERP, TP53 apoptosis effector		144197	-2.85936	0.00430234	SKI	v-ski sarcoma viral oncogene homolog (avian)
192307	3.51542	0.0124539	PRSS23	protease, serine, 23		102846	-2.85725	0.0241088	LOC284379
120855	3.4895	0.000455049	ZNF691	zinc finger protein 691		182760	-2.85653	0.00347722	REP15
190304	3.47915	0.00625929	SLC27A2	solute carrier family 27 (fatty acid transporter), member 2		100410	-2.85278	0.00665582	LOC339483
134260	3.47893	0.0042941	PCBP4	poly(rC) binding protein 4		124299	-2.84318	0.00589597	ADH1A	alcohol dehydrogenase 1A (class I), alpha polypeptide
224600	3.47886	0.0156359	MUM1L1	melanoma associated antigen (mutated) 1-like 1		152747	-2.84004	0.0281661	ELA2B
206886	3.47865	0.00328141	RNF167	ring finger protein 167		198728	-2.83401	0.000277271	CEP55	centrosomal protein 55kDa
215545	3.47863	0.0095038	NLGN4Y	neuroligin 4, Y-linked		144221	-2.83143	0.0132686	TAF15	TAF15 RNA polymerase II, TATA box binding protein (TBP)-associated factor, 68kDa
110900	3.47534	0.00579292	KCNJ15	potassium inwardly-rectifying channel, subfamily J, member 15		131060	-2.82899	0.0064078
179991	3.47295	0.0193514	AQP6	aquaporin 6, kidney specific		229134	-2.82425	0.0424748
115764	3.4618	0.0298665	NELL1	NEL-like 1 (chicken)		136723	-2.82216	0.0256057	PCSK4	proprotein convertase subtilisin/kexin type 4
191318	3.45641	0.00402355	C6orf75	chromosome 6 open reading frame 75		103476	-2.80414	0.0469231	HYPB
168813	3.45298	0.0281734	OGDHL	oxoglutarate dehydrogenase-like		164232	-2.80404	0.0022816	NF1	neurofibromin 1 (neurofibromatosis, von Recklinghausen disease, Watson disease)
151054	3.4452	0.00232496	P15RS			222735	-2.78107	0.0107168	HSD17B12	hydroxysteroid (17-beta) dehydrogenase 12
156018	3.44147	0.00287423	CCNG1	cyclin G1		216520	-2.78009	0.0239155	FOSL1	FOS-like antigen 1
194243	3.441	0.00272257	ATP5A1	ATP synthase, H+ transporting, mitochondrial F1 complex, alpha subunit, isoform 1, cardiac muscle		182228	-2.76537	0.0181588	GATA2	GATA binding protein 2
218218	3.42735	0.0116454	SMPDL3B	sphingomyelin phosphodiesterase, acid-like 3B		690434	-2.76263	0.000321962
186545	3.42661	0.0174846	ZNF204	zinc finger protein 204		127008	-2.75891	0.00660765	OR56A3	olfactory receptor, family 56, subfamily A, member 3
148794	3.41839	0.00178229				180280	-2.75681	0.00755319	MGC15912|RBM14	RNA binding motif protein 14
149869	3.41255	0.000145303	C1QTNF7	C1q and tumor necrosis factor related protein 7		484928	-2.7555	0.00110818
121861	3.40945	0.028096	SLC35C2	solute carrier family 35, member C2		232413	-2.75245	0.0362278
199775	3.38842	0.000383773	ATG4B	ATG4 autophagy related 4 homolog B (S. cerevisiae)		108201	-2.74995	0.0116899	PHC3	polyhomeotic like 3 (Drosophila)
170858	3.37987	0.0314617	PAX2	paired box gene 2		189410	-2.74454	0.0035319	C20orf57	chromosome 20 open reading frame 57
133742	3.36832	0.0145187	PPAP2B	phosphatidic acid phosphatase type 2B		235846	-2.73112	0.00866268	NFAM1	NFAT activating protein with ITAM motif 1
141684	3.36815	5.71723e-05	WDR13	WD repeat domain 13		168822	-2.727	0.0477732	HS6ST1P|HS6ST1	heparan sulfate 6-O-sulfotransferase 1 pseudogene|heparan sulfate 6-O-sulfotransferase 1
134760	3.36601	0.0497583	FGFRL1	fibroblast growth factor receptor-like 1		189444	-2.72673	0.0175368
228063	3.36469	0.0187339	LOC158563			223116	-2.72214	0.0430949	FAM24B	family with sequence similarity 24, member B
184798	3.36313	0.0308015	PKNOX2	PBX/knotted 1 homeobox 2		203851	-2.72122	0.0104941	MGC16037
110433	3.35909	0.038541	IL20RA	interleukin 20 receptor, alpha		112953	-2.71876	0.00575681
191084	3.34567	0.0193156	CTHRC1	collagen triple helix repeat containing 1		706212	-2.71511	0.00015792
213105	3.33871	0.00147017	LOC441244			106343	-2.71032	0.00164756
152237	3.33391	0.00197357	KIAA0802	KIAA0802		133405	-2.70891	0.00716992	XCL1	chemokine (C motif) ligand 1
711231	3.33207	0.00193349	LOC285556			235617	-2.70646	0.0176332
197230	3.33118	0.0106331	CD24	CD24 antigen (small cell lung carcinoma cluster 4 antigen)		126980	-2.70439	0.0441694	TXNL2	thioredoxin-like 2
161198	3.33083	0.00795656	FAH	fumarylacetoacetate hydrolase (fumarylacetoacetase)		101692	-2.7041	0.00355367
148731	3.32517	0.030975	KIAA1324	KIAA1324		713949	-2.70375	0.0147229
196533	3.32046	0.000986735	LAMP1	lysosomal-associated membrane protein 1		189066	-2.69377	0.000451496	MICAL3	microtubule associated monoxygenase, calponin and LIM domain containing 3
122168	3.31745	0.000349549	CHMP7	CHMP family, member 7		190303	-2.68162	0.016249	CYP2D6	cytochrome P450, family 2, subfamily D, polypeptide 6
112215	3.31279	0.0144273	LOC132391			221542	-2.68088	0.0056184	C20orf75	chromosome 20 open reading frame 75
109770	3.31029	0.00124847	RPUSD3	RNA pseudouridylate synthase domain containing 3		113042	-2.67975	0.0460395	FGF2	fibroblast growth factor 2 (basic)
104777	3.30384	0.0276232	ATP6V1C2	ATPase, H+ transporting, lysosomal 42kDa, V1 subunit C isoform 2		103944	-2.67815	0.00621092	FBF1	Fas (TNFRSF6) binding factor 1
169345	3.29999	0.0100792	NUDCD3	NudC domain containing 3		158079	-2.67743	0.0262673	LTB4R2	leukotriene B4 receptor 2
169243	3.2998	0.00163864	DHRS7	dehydrogenase/reductase (SDR family) member 7		198858	-2.67554	0.0128247	SUHW2	suppressor of hairy wing homolog 2 (Drosophila)
145554	3.29508	0.0154792	GALT	galactose-1-phosphate uridylyltransferase		126398	-2.67491	0.0287582
104621	3.29121	0.00312807	RNF146	ring finger protein 146		234389	-2.67198	0.00299738
168202	3.28232	0.00530951	SQSTM1	sequestosome 1		161427	-2.66616	0.0177841	KIF1B	kinesin family member 1B
210342	3.2792	0.013307	SERPINE2	serpin peptidase inhibitor, clade E (nexin, plasminogen activator inhibitor type 1), member 2		649805	-2.66493	0.0216272	KIAA0125	KIAA0125
139584	3.27628	0.00153021	HLA-A	major histocompatibility complex, class I, A		125805	-2.65129	0.00307749	SEMA7A	sema domain, immunoglobulin domain (Ig), and GPI membrane anchor, (semaphorin) 7A
211171	3.27453	0.0222244	PAQR4	progestin and adipoQ receptor family member IV		131413	-2.64845	0.000346129	LOC285299
125760	3.27401	0.0256138	CRSP3	cofactor required for Sp1 transcriptional activation, subunit 3, 130kDa		138955	-2.63987	0.0123572	POLQ	polymerase (DNA directed), theta
187138	3.26839	0.0375166	HOMER2	homer homolog 2 (Drosophila)		118480	-2.63197	0.0223772	LOC391773
128609	3.26711	0.0299643	ANK1	ankyrin 1, erythrocytic		160315	-2.62849	0.0410893	DLEU2	deleted in lymphocytic leukemia, 2
105686	3.25467	0.00467103	LOC113444			172824	-2.62838	0.00493516	TSC22D4	TSC22 domain family, member 4
228126	3.24157	0.00831104				704061	-2.62805	0.00657767
114765	3.23969	0.0110316	HBS1L	HBS1-like (S. cerevisiae)		189090	-2.62353	0.00346314	KLF4	Kruppel-like factor 4 (gut)
174476	3.23225	0.0485409	ADCY5	adenylate cyclase 5		230675	-2.62274	0.0166269	C8orf77	chromosome 8 open reading frame 77
117604	3.23087	0.0116191	C16orf51	chromosome 16 open reading frame 51		10400392	-2.61883	0.0220799
120415	3.22916	0.00243559	SGCD	sarcoglycan, delta (35kDa dystrophin-associated glycoprotein)		149728	-2.60504	0.00571649	C10orf121	chromosome 10 open reading frame 121
141257	3.22547	0.0417088	TRIM45	tripartite motif-containing 45		155879	-2.60466	0.0112273	PXMP4	peroxisomal membrane protein 4, 24kDa
193596	3.22533	0.000439911	ARG2	arginase, type II		149045	-2.5951	0.0393675
133539	3.22454	0.0200362	PGBD5	piggyBac transposable element derived 5		138764	-2.58865	0.0308768	PAPLN	papilin, proteoglycan-like sulfated glycoprotein
190945	3.2218	0.00448147	PTGES	prostaglandin E synthase		129974	-2.58864	0.0172624	ADAMDEC1	ADAM-like, decysin 1
124626	3.22155	0.0255655	SLC3A1	solute carrier family 3 (cystine, dibasic and neutral amino acid transporters, activator of cystine, dibasic and neutral amino acid transport), member 1		195624	-2.58758	0.0253787	SHANK3	SH3 and multiple ankyrin repeat domains 3
119269	3.2198	0.0309835	PRKAR1A	protein kinase, cAMP-dependent, regulatory, type I, alpha (tissue specific extinguisher 1)		170374	-2.5801	0.00899575	TNK2	tyrosine kinase, non-receptor, 2
139126	3.21508	0.00718056	HRSP12	heat-responsive protein 12		229406	-2.57785	0.00155855	RARB	retinoic acid receptor, beta
192140	3.21401	0.00284295	ACSL1	acyl-CoA synthetase long-chain family member 1		143443	-2.57444	0.0218016	GNG7	guanine nucleotide binding protein (G protein), gamma 7
166946	3.20155	0.000599486	ATF4	activating transcription factor 4 (tax-responsive enhancer element B67)		460746	-2.57087	0.0025518	C1orf145	chromosome 1 open reading frame 145
106775	3.19927	0.00545895	FBXO15	F-box protein 15		230983	-2.56999	0.0386679
112626	3.18877	0.0119574	MAP7	microtubule-associated protein 7		227956	-2.56867	0.0183772	MT1J	metallothionein 1J
216528	3.18497	0.023713	ANKRD10	ankyrin repeat domain 10		209952	-2.56799	0.000303971	LOC402100
135007	3.18287	0.0106865	KCNJ5	potassium inwardly-rectifying channel, subfamily J, member 5		124894	-2.56736	0.0218691
201627	3.1815	0.0324915	LAMC2	laminin, gamma 2		194532	-2.56707	0.0151516
185129	3.17692	0.000136806	FLJ14166			114179	-2.566	0.0117638	C6orf150	chromosome 6 open reading frame 150
166515	3.17633	0.00183377	RTN4IP1	reticulon 4 interacting protein 1		230820	-2.5603	0.019314	LOC96597
141689	3.17593	0.0125959	CCND1	cyclin D1		548935	-2.56018	0.0207853
158722	3.17238	0.00447989	PIPOX	pipecolic acid oxidase		216817	-2.55639	0.0232183
107487	3.16385	0.00116648				232200	-2.55497	0.00503659	FLJ13439
210913	3.16129	0.0164159	ACAA2	acetyl-Coenzyme A acyltransferase 2 (mitochondrial 3-oxoacyl-Coenzyme A thiolase)		165826	-2.5539	0.0302007
158259	3.16028	0.00105419	CRB3	crumbs homolog 3 (Drosophila)		416900	-2.54812	0.0134922	MBL1P1	mannose-binding lectin (protein A) 1, pseudogene 1
167986	3.15498	0.000547298	LDHB	lactate dehydrogenase B		210109	-2.54674	0.00941532
109051	3.15189	0.0493588	HGD	homogentisate 1,2-dioxygenase (homogentisate oxidase)		179926	-2.54548	0.0372134	SIT1	signaling threshold regulating transmembrane adaptor 1
189406	3.1483	0.000667527	MGAT1	mannosyl (alpha-1,3-)-glycoprotein beta-1,2-N-acetylglucosaminyltransferase		146709	-2.54362	0.0245298	FLJ10808
154230	3.14402	0.0136077	TREM1	triggering receptor expressed on myeloid cells 1		171828	-2.53138	0.00393127	DFFB	DNA fragmentation factor, 40kDa, beta polypeptide (caspase-activated DNase)
112470	3.1435	0.0375534	RNF183	ring finger protein 183		215702	-2.52464	0.00408331	EML2	echinoderm microtubule associated protein like 2
199772	3.14206	0.00763893	FAM20C	family with sequence similarity 20, member C		699542	-2.52081	3.0587e-05
134740	3.1346	0.0251245	FKBP1B	FK506 binding protein 1B, 12.6 kDa		216353	-2.50856	0.0401666	ADAMTS1	ADAM metallopeptidase with thrombospondin type 1 motif, 1
188155	3.12732	0.00169562	UNQ470			105251	-2.50709	0.047514	FLJ21924
207012	3.12641	0.0268965	SCAMP2	secretory carrier membrane protein 2		216283	-2.50574	0.0137788	LSM8	LSM8 homolog, U6 small nuclear RNA associated (S. cerevisiae)
179143	3.12173	0.000222677	MCRS1	microspherule protein 1		197890	-2.50339	0.0154169	PAX4	paired box gene 4
135473	3.11754	0.017288	CCDC11	coiled-coil domain containing 11		180071	-2.50292	0.00145496	C9orf3	chromosome 9 open reading frame 3
219351	3.10721	0.00444168	TCP1	t-complex 1		173838	-2.50156	0.00762901	GGTLA1	gamma-glutamyltransferase-like activity 1
138177	3.09937	0.000552175	PGM2L1	phosphoglucomutase 2-like 1		146533	-2.50045	0.0320927	YPEL2	yippee-like 2 (Drosophila)
201429	3.09875	0.00552661	EPHX1	epoxide hydrolase 1, microsomal (xenobiotic)		219156	-2.49705	0.0186186
212291	3.09722	0.0017152	ILF2	interleukin enhancer binding factor 2, 45kDa		202313	-2.49112	0.0345195	GPR126	G protein-coupled receptor 126
150673	3.08855	0.00809733	HARS2	histidyl-tRNA synthetase 2		118448	-2.4903	0.0316348
169462	3.08817	0.00410936	PPFIA1	protein tyrosine phosphatase, receptor type, f polypeptide (PTPRF), interacting protein (liprin), alpha 1		155861	-2.48735	0.00646857
199310	3.08578	0.0039538	FBXW4	F-box and WD-40 domain protein 4		131169	-2.48734	0.00555764
186608	3.08446	0.00158685	MIZF			172477	-2.48312	0.0319642	KIAA1731	KIAA1731
182980	3.08051	0.00366515	SPTLC1	serine palmitoyltransferase, long chain base subunit 1		151419	-2.48239	0.00893517	C19orf25	chromosome 19 open reading frame 25
168952	3.07914	0.00298095	C8orf72	chromosome 8 open reading frame 72		142719	-2.47797	0.0290511	SNCB	synuclein, beta
232243	3.07871	0.00432747				174451	-2.47575	0.0187359	CEP135	centrosomal protein 135kDa
127989	3.07143	0.00976377	RWDD3	RWD domain containing 3		530623	-2.47356	0.00549715
209786	3.07058	0.00328414	CTNND2	catenin (cadherin-associated protein), delta 2 (neural plakophilin-related arm-repeat protein)		204251	-2.47107	0.020552	LOC200312
154932	3.06151	0.00512322	GRN	granulin		706831	-2.46543	0.0485065
219350	3.05726	0.00931032	AK3L1	adenylate kinase 3-like 1		217204	-2.46364	0.0261876
184285	3.05297	0.0266335	HES6	hairy and enhancer of split 6 (Drosophila)		121683	-2.46304	0.0490599	KRT6IRS
107543	3.05282	0.00410143	ENPP5	ectonucleotide pyrophosphatase/phosphodiesterase 5 (putative function)		144618	-2.46069	0.0379872	DRD2	dopamine receptor D2
199974	3.04951	0.0017842	DUS3L	dihydrouridine synthase 3-like (S. cerevisiae)		187988	-2.45977	0.00628939	FUT8	fucosyltransferase 8 (alpha (1,6) fucosyltransferase)
194177	3.04903	0.0298524	FLJ21159			543186	-2.45909	0.00823993
205308	3.04035	0.00513778	EEFSEC	eukaryotic elongation factor, selenocysteine-tRNA-specific		175963	-2.45722	0.0140599
203429	3.03896	0.016453	ARFIP2	ADP-ribosylation factor interacting protein 2 (arfaptin 2)		211052	-2.45529	0.00751513	EFHD2	EF-hand domain family, member D2
223193	3.03877	0.00295537	PDLIM3	PDZ and LIM domain 3		208620	-2.44649	0.0282657
208933	3.03869	0.00862116	LOC390298			164455	-2.44418	0.0123861
175266	3.03798	0.00134038	DSU			235168	-2.44303	0.000115812
123611	3.03566	0.0265835	LOC442225			615986	-2.44297	0.0367594
195464	3.0343	0.0456706	ASRGL1	asparaginase like 1		100694	-2.44071	0.0400273	PHTF2	putative homeodomain transcription factor 2
202484	3.02997	0.00220866	YIPF1	Yip1 domain family, member 1		235516	-2.4395	0.0429863
185093	3.02775	0.013619	RNASET2	ribonuclease T2		128344	-2.43869	0.0101585
148158	3.02643	0.0028988	FLJ45422			219483	-2.43752	0.0186063	TLK1	tousled-like kinase 1
200907	3.02327	0.0234909	BAG1	BCL2-associated athanogene		416533	-2.43649	0.0231206	LOC440320|LOC440243|LOC440318|LOC440247|FLJ36131
144688	3.02212	0.0315341	MOSPD1	motile sperm domain containing 1		264940	-2.43647	0.0032797
207786	3.01888	0.0377724				202630	-2.43592	0.00854913
180471	3.01466	0.0182703	FLJ34048			212661	-2.43242	0.0233303	C10orf56	chromosome 10 open reading frame 56
185757	3.01339	0.0197573	TRIM28	tripartite motif-containing 28		144571	-2.43066	0.0137113	ZDHHC8	zinc finger, DHHC-type containing 8
169003	3.00295	0.039407	SFRP4	secreted frizzled-related protein 4		237080	-2.43002	0.0107317
207747	3.00061	0.000220256	SEC13L1	SEC13-like 1 (S. cerevisiae)		236396	-2.42948	0.0470851	LOC391014
234317	2.99418	0.00616975				343680	-2.42547	0.0336178
211600	2.98647	0.0108451	AEBP1	AE binding protein 1		197392	-2.41577	0.000506413
113861	2.98573	0.0455448	CRISPLD1	cysteine-rich secretory protein LCCL domain containing 1		339932	-2.40988	0.0150554
198262	2.98477	0.000400327	ICA1	islet cell autoantigen 1, 69kDa		123933	-2.40359	0.00835418	MLL3	myeloid/lymphoid or mixed-lineage leukemia 3
126204	2.97867	0.00737428	GNPDA1	glucosamine-6-phosphate deaminase 1		214165	-2.40215	0.0123737	ABCE1	ATP-binding cassette, sub-family E (OABP), member 1
154143	2.9761	0.00633091	MGC23985			112364	-2.4001	0.0194146
217593	2.97413	0.00271708	MRFAP1L1	Morf4 family associated protein 1-like 1		197726	-2.39297	0.00441518	LOC440984
200293	2.97201	0.00739426	RNF170	ring finger protein 170		116702	-2.3891	0.000616346
146652	2.9707	0.0424105	KIAA0703			124085	-2.38875	0.00321939	KIAA0495
210989	2.97033	0.00888327	LMNA	lamin A/C		191693	-2.38705	0.00387542	SLC41A2	solute carrier family 41, member 2
109215	2.96938	0.0352177	CCNG2	cyclin G2		133461	-2.38514	0.0110969	HMX3	homeobox (H6 family) 3
124907	2.96619	0.0215619	LRRC6	leucine rich repeat containing 6		188546	-2.3851	0.0102342	NAALADL2	N-acetylated alpha-linked acidic dipeptidase-like 2
100912	2.96479	0.00373364				233158	-2.38493	0.0466395
200631	2.9634	0.0279278	LOC390007			147079	-2.38064	0.0407198	TCIRG1	T-cell, immune regulator 1, ATPase, H+ transporting, lysosomal V0 protein a isoform 3
104588	2.95411	0.0197739	NUDT14	nudix (nucleoside diphosphate linked moiety X)-type motif 14		543830	-2.38056	0.0349802	NBPF4|RP11-483I13.1	neuroblastoma breakpoint family, member 4
160314	2.95317	0.0057408	DBNL	drebrin-like		697660	-2.37975	0.000204801
206301	2.9505	0.0156474	PSD3	pleckstrin and Sec7 domain containing 3		208403	-2.37891	0.00841358
168452	2.94665	0.00217812	MGC17299			168361	-2.37792	0.0311815	C14orf172	chromosome 14 open reading frame 172
204590	2.94641	0.00545116	CD300C	CD300C antigen		226580	-2.37721	0.0048906
102926	2.94059	0.0232963	SERPINE1	serpin peptidase inhibitor, clade E (nexin, plasminogen activator inhibitor type 1), member 1		218186	-2.37655	0.0266331	KRT3	keratin 3
207417	2.94056	0.00594972	HDAC2	histone deacetylase 2		146642	-2.36956	0.0443544
144879	2.93956	0.00930596	ATG12	ATG12 autophagy related 12 homolog (S. cerevisiae)		176234	-2.3686	0.00539647	C20orf59	chromosome 20 open reading frame 59
199316	2.9362	0.00185234	SHFM3P1	split hand/foot malformation (ectrodactyly) type 3 pseudogene 1		116331	-2.36264	0.0309778	EPIM	epimorphin
219598	2.92932	0.0257459	STAU2	staufen, RNA binding protein, homolog 2 (Drosophila)		156010	-2.36245	0.0262523	KIAA1904
163631	2.92487	0.0143952				154115	-2.35998	0.0374941
169984	2.92259	0.0207677	SEPP1	selenoprotein P, plasma, 1		213394	-2.35803	0.0193851
144588	2.92039	0.00726425	MFGE8	milk fat globule-EGF factor 8 protein		232255	-2.35642	0.0143614	C20orf117	chromosome 20 open reading frame 117
130750	2.9126	0.0205582	C1orf165	chromosome 1 open reading frame 165		308378	-2.35429	0.0459887
186980	2.90541	0.0332118	LOC112869			361497	-2.3498	0.000608165
114444	2.90251	0.0084088	KIAA1456			170535	-2.34446	0.00287824	BAK1	BCL2-antagonist/killer 1
165362	2.896	0.00935314	EMILIN1	elastin microfibril interfacer 1		536310	-2.343	0.0104361
180829	2.89399	0.0125145	PMM1	phosphomannomutase 1		188411	-2.34134	0.0223253	ANKRD11	ankyrin repeat domain 11
206274	2.89079	0.0392799	WNT11	wingless-type MMTV integration site family, member 11		468014	-2.33703	0.000280806
125219	2.88306	0.00115061	TSPYL1	TSPY-like 1		233305	-2.33373	0.0492452
204877	2.88281	0.00428748	TSPAN3	tetraspanin 3		118205	-2.33132	0.0181574	PADI2	peptidyl arginine deiminase, type II
184507	2.8768	0.0312984	AADAT	aminoadipate aminotransferase		100722	-2.32964	0.00637379
185286	2.87505	0.0030747	BNIP1	BCL2/adenovirus E1B 19kDa interacting protein 1		138552	-2.32913	0.000288666
135309	2.87196	0.0361089	C1QTNF3	C1q and tumor necrosis factor related protein 3		225940	-2.32745	0.0233643	GPM6B	glycoprotein M6B
188434	2.8681	0.0331425	FA2H	fatty acid 2-hydroxylase		190804	-2.3263	0.0100953	FLJ21616
121390	2.85711	0.00287186	C6orf134	chromosome 6 open reading frame 134		116953	-2.32475	0.00711223
194045	2.85486	0.02866	B4GALT2	UDP-Gal:betaGlcNAc beta 1,4- galactosyltransferase, polypeptide 2		701053	-2.32324	0.0322327
165678	2.85147	0.0257615	C8orf33	chromosome 8 open reading frame 33		178477	-2.3183	0.00898285
102848	2.85124	0.0013062	MFHAS1	malignant fibrous histiocytoma amplified sequence 1		164015	-2.31385	0.015715	BTK	Bruton agammaglobulinemia tyrosine kinase
114130	2.84905	0.047265	PHGDHL1	phosphoglycerate dehydrogenase like 1		211325	-2.31257	0.0276218	ZNF650	zinc finger protein 650
201130	2.84511	0.0164678	AGPAT6	1-acylglycerol-3-phosphate O-acyltransferase 6 (lysophosphatidic acid acyltransferase, zeta)		190302	-2.31023	0.0261234	CYP2D7P1|CYP2D6	cytochrome P450, family 2, subfamily D, polypeptide 7 pseudogene 1|cytochrome P450, family 2, subfamily D, polypeptide 6
185071	2.84494	0.00743474	NR2F6	nuclear receptor subfamily 2, group F, member 6		187876	-2.31013	0.00492472	IRX6	iroquois homeobox protein 6
210668	2.84424	0.0252474	SLC36A4	solute carrier family 36 (proton/amino acid symporter), member 4		164563	-2.30441	0.0161737	CENPJ	centromere protein J
100039	2.84265	0.00208916	ANAPC7	anaphase promoting complex subunit 7		140057	-2.30203	0.0012187
112910	2.84146	0.00559489	TRIP10	thyroid hormone receptor interactor 10		216339	-2.30092	0.0272905	ELOVL6	ELOVL family member 6, elongation of long chain fatty acids (FEN1/Elo2, SUR4/Elo3-like, yeast)
185658	2.83932	0.001813	KIF3B	kinesin family member 3B		101445	-2.30058	0.0481145
697901	2.83636	0.035478	LOC439938			103291	-2.30057	0.0223308
228255	2.83578	0.00674742				544895	-2.29994	0.000187692
197486	2.83528	0.00268795	ABCF3	ATP-binding cassette, sub-family F (GCN20), member 3		187910	-2.29806	0.0324542	LOC339804
109165	2.83423	0.00155011	BNIP3	BCL2/adenovirus E1B 19kDa interacting protein 3		100182	-2.29392	0.00159869	LOC340171
189538	2.83221	0.00382493	PDGFC	platelet derived growth factor C		180665	-2.29357	0.00117119	LOC440186
125079	2.83108	0.0362392	INT1			148051	-2.29284	0.000408721	PELI2	pellino homolog 2 (Drosophila)
171400	2.83056	0.0107766	LAPTM4B	lysosomal associated protein transmembrane 4 beta		149653	-2.29182	0.0114543	KIFC3	kinesin family member C3
221224	2.82783	0.00226382				196634	-2.28827	0.0125607	OR6Q1	olfactory receptor, family 6, subfamily Q, member 1
119487	2.82323	0.0128046	TMEM101	transmembrane protein 101		132029	-2.28476	0.0020549
180334	2.82208	0.00861713	ELMO2	engulfment and cell motility 2 (ced-12 homolog, C. elegans)		128935	-2.28331	0.00528248	ZNF268	zinc finger protein 268
157165	2.8201	0.0262473	HINT3	histidine triad nucleotide binding protein 3		187211	-2.28321	0.0292182	TRGC2|TRGV5|LOC442535	T cell receptor gamma constant 2|T cell receptor gamma variable 5
165302	2.81875	0.0212521	EIF4EBP1	eukaryotic translation initiation factor 4E binding protein 1		232976	-2.28152	0.0314124	C10orf54	chromosome 10 open reading frame 54
205258	2.81717	0.00210356	DKFZp762F0713			231223	-2.28053	0.00658181
215941	2.81669	0.0295652	RCN1	reticulocalbin 1, EF-hand calcium binding domain		106876	-2.27921	0.0468653	KIAA1324L	KIAA1324-like
178671	2.80857	0.00469601	UBL7	ubiquitin-like 7 (bone marrow stromal cell-derived)		143671	-2.27665	0.04583	COX6B2	cytochrome c oxidase subunit VIb polypeptide 2 (testis)
159127	2.80631	0.0231577	DAP	death-associated protein		239100	-2.27535	0.00020474
195541	2.80455	0.017663	FBXW9	F-box and WD-40 domain protein 9		547737	-2.27303	0.0286663
212754	2.804	0.00257739	C14orf168	chromosome 14 open reading frame 168		700357	-2.2728	0.00212789
192617	2.7867	0.00119067	PPP2CB	protein phosphatase 2 (formerly 2A), catalytic subunit, beta isoform		129234	-2.27061	0.0218861	LOC441790
223131	2.78475	0.0015225	NARF	nuclear prelamin A recognition factor		234488	-2.26794	0.0491307
134551	2.78451	0.0311712	SERPINI1	serpin peptidase inhibitor, clade I (neuroserpin), member 1		193222	-2.26314	0.0028401
162809	2.78239	0.0401547	RBKS	ribokinase		111389	-2.2624	0.048837	NOX1	NADPH oxidase 1
170697	2.78088	0.000363873	DDX41	DEAD (Asp-Glu-Ala-Asp) box polypeptide 41		137496	-2.26235	0.0156229	OR4B1	olfactory receptor, family 4, subfamily B, member 1
134657	2.7768	0.0217695	PRSS15	protease, serine, 15		127071	-2.26171	0.0323775
120739	2.75183	0.00288507	LDHA	lactate dehydrogenase A		142775	-2.26054	0.00798808
109862	2.74645	0.00379615	UQCRC2	ubiquinol-cytochrome c reductase core protein II		10715552	-2.25996	0.00031659
126166	2.74467	0.0349138	FXYD3	FXYD domain containing ion transport regulator 3		205153	-2.25852	0.0330969	XPO1	exportin 1 (CRM1 homolog, yeast)
150213	2.74134	0.0189862	KIAA1970			103589	-2.25822	0.0195629	CXCR3	chemokine (C-X-C motif) receptor 3
142866	2.73878	0.026952	RET	ret proto-oncogene (multiple endocrine neoplasia and medullary thyroid carcinoma 1, Hirschsprung disease)		171513	-2.25732	0.000400253	FLJ22833
175047	2.73854	0.000106929	FKBP8	FK506 binding protein 8, 38kDa		162571	-2.25542	0.00622902	PCSK5	proprotein convertase subtilisin/kexin type 5
162448	2.73752	0.00381935				201868	-2.25329	0.045425	JMJD1C	jumonji domain containing 1C
158262	2.73738	0.0001839	F2R	coagulation factor II (thrombin) receptor		232933	-2.25255	0.0058276
103392	2.72234	0.0249914	TTRAP	TRAF and TNF receptor associated protein		229452	-2.24477	0.00493671	ACOX1	acyl-Coenzyme A oxidase 1, palmitoyl
174203	2.7166	0.0108686	ABAT	4-aminobutyrate aminotransferase		216489	-2.2437	0.0461664	PTK6	PTK6 protein tyrosine kinase 6
234815	2.71105	0.00851118				231854	-2.24093	0.0383828	C10orf71	chromosome 10 open reading frame 71
210130	2.6992	0.00403612	HNRPH2	heterogeneous nuclear ribonucleoprotein H2 (H')		158533	-2.23882	0.0179449	MDS1	myelodysplasia syndrome 1
115485	2.69861	0.00591893	FAHD2A	fumarylacetoacetate hydrolase domain containing 2A		172727	-2.23526	0.0241408	ANXA3	annexin A3
166429	2.69847	0.0114874	C17orf61|PLSCR3	chromosome 17 open reading frame 61|phospholipid scramblase 3		164529	-2.23262	0.0232215	AARSD1	alanyl-tRNA synthetase domain containing 1
196745	2.69577	0.00109329	GBL			121822	-2.23053	0.0487783	LOC115110
155740	2.69307	0.0233997	APOE|HMGA1	apolipoprotein E|high mobility group AT-hook 1		236811	-2.22994	0.0271044
126099	2.69293	0.000155582	ACAA1	acetyl-Coenzyme A acyltransferase 1 (peroxisomal 3-oxoacyl-Coenzyme A thiolase)		300613	-2.22392	0.024697	C13orf25	chromosome 13 open reading frame 25
157593	2.69222	0.00151144	LMAN2	lectin, mannose-binding 2		230259	-2.22315	0.0300184
131758	2.69177	0.00355603	RANGAP1	Ran GTPase activating protein 1		119925	-2.22138	0.0374946	MGC42174
228105	2.68762	0.0443663	SFTPG	surfactant associated protein G		120747	-2.22086	0.0044644
151341	2.6867	0.00194905	COMMD10	COMM domain containing 10		107386	-2.21942	0.0366995	RPL34	ribosomal protein L34
146916	2.68597	0.0116347	F3	coagulation factor III (thromboplastin, tissue factor)		229767	-2.21933	0.0380755
203857	2.68467	0.00783632	GANAB	glucosidase, alpha; neutral AB		236414	-2.218	0.0237418
192168	2.68242	0.035379	PLRG1	pleiotropic regulator 1 (PRL1 homolog, Arabidopsis)		153110	-2.21696	0.0263327	CEI
137614	2.68083	0.00113336	CHID1	chitinase domain containing 1		181811	-2.21498	0.0310346	LOC400985
173181	2.68074	0.0251847	CEACAM1	carcinoembryonic antigen-related cell adhesion molecule 1 (biliary glycoprotein)		189302	-2.21401	0.0254654
120763	2.68042	0.0366852	ANTXR1	anthrax toxin receptor 1		234785	-2.21167	0.00740125	PLEKHH1	pleckstrin homology domain containing, family H (with MyTH4 domain) member 1
151483	2.6795	0.00522789	KIAA1191			446330	-2.20985	0.0282835
204612	2.67254	0.0494607	FCGR2B	Fc fragment of IgG, low affinity IIb, receptor (CD32)		173501	-2.20174	0.00674526
131148	2.66905	0.0222493	POLR3H	polymerase (RNA) III (DNA directed) polypeptide H (22.9kD)		209615	-2.20025	0.0138644	C14orf106	chromosome 14 open reading frame 106
198636	2.66785	0.00250204				697779	-2.19965	0.00344058	LOC149157
199789	2.66777	0.00609198	SNRP70	small nuclear ribonucleoprotein 70kDa polypeptide (RNP antigen)		143527	-2.19949	0.0348756
155261	2.66763	0.00288479				190970	-2.19888	0.00501554
212994	2.66726	0.00612176	TUBA6	tubulin, alpha 6		118340	-2.19636	0.00810056	P2RX2	purinergic receptor P2X, ligand-gated ion channel, 2
196828	2.66601	0.00257182	GCLC	glutamate-cysteine ligase, catalytic subunit		705119	-2.19598	0.00052936	FLJ34208
217101	2.66336	0.0019986	MKRN2	makorin, ring finger protein, 2		173500	-2.19433	0.000988516	PHF13	PHD finger protein 13
114806	2.66012	0.032641	LRP12	low density lipoprotein-related protein 12		202382	-2.194	0.0367232	FHL1	four and a half LIM domains 1
204144	2.66005	0.00075982	QRSL1	glutaminyl-tRNA synthase (glutamine-hydrolyzing)-like 1		488455	-2.19324	0.0340094
179908	2.65816	0.000543821	MRPL44	mitochondrial ribosomal protein L44		198428	-2.1931	0.00356007	ANKRD13	ankyrin repeat domain 13
112725	2.65357	0.00475985	RANBP3	RAN binding protein 3		182939	-2.19257	0.00287543	OFD1	oral-facial-digital syndrome 1
195704	2.65076	0.00215846	SARS	seryl-tRNA synthetase		265696	-2.19205	0.000273608
220935	2.64966	0.0110339	NDRG3	NDRG family member 3		211414	-2.19076	0.00338728	RSRC1	arginine/serine-rich coiled-coil 1
148252	2.64228	0.0435187	TFAP2A	transcription factor AP-2 alpha (activating enhancer binding protein 2 alpha)		206878	-2.1902	0.0243432
215766	2.64184	0.0473406	MYO6	myosin VI		208172	-2.18765	0.0351759
131445	2.64152	0.02211	LY6E	lymphocyte antigen 6 complex, locus E		113113	-2.18446	0.00477286	TCF7L2	transcription factor 7-like 2 (T-cell specific, HMG-box)
150652	2.64095	0.0136484	ARTN	artemin		157015	-2.18434	0.0117858	LOC391599
223217	2.64003	0.0229051	TBPL1	TBP-like 1		10702703	-2.18197	0.0331809
109173	2.63883	0.0286687				705075	-2.1802	0.00597629
715421	2.63842	0.000451821				100736	-2.17851	0.0352638	PLCB4	phospholipase C, beta 4
135242	2.63799	0.00651991	LOC401305|LOC339879|LOC442505			195871	-2.1772	0.0191034	KLF15	Kruppel-like factor 15
105298	2.6319	0.00675483	SF3B4	splicing factor 3b, subunit 4, 49kDa		230034	-2.17535	0.0154478
100949	2.63186	0.00187384	TFF3	trefoil factor 3 (intestinal)		170466	-2.17369	0.00109663	CDK5R2	cyclin-dependent kinase 5, regulatory subunit 2 (p39)
178534	2.63145	0.0357495	PSMD8	proteasome (prosome, macropain) 26S subunit, non-ATPase, 8		144301	-2.17002	0.0422427	AMAC1L2	acyl-malonyl condensing enzyme 1-like 2
110573	2.6296	0.00738284	SPATA7	spermatogenesis associated 7		150377	-2.16996	0.000370085	OR2B11	olfactory receptor, family 2, subfamily B, member 11
230894	2.62585	0.00681475	FAM61B	family with sequence similarity 61, member B		189521	-2.16937	0.0204413	TBL1XR1	transducin (beta)-like 1X-linked receptor 1
195267	2.62581	0.00670635	SIL1	SIL1 homolog, endoplasmic reticulum chaperone (S. cerevisiae)		127236	-2.16918	0.0328676
214214	2.61768	0.000516265	ANXA5	annexin A5		146543	-2.16623	0.000644174	ROBO4	roundabout homolog 4, magic roundabout (Drosophila)
105835	2.61531	0.0159658	TRIM41	tripartite motif-containing 41		164701	-2.16281	0.0118753	DLG3	discs, large homolog 3 (neuroendocrine-dlg, Drosophila)
119684	2.61471	0.0175826	BTBD3	BTB (POZ) domain containing 3		232185	-2.16082	0.0229771
187011	2.61394	0.0266876	DUSP10	dual specificity phosphatase 10		101310	-2.1598	0.00523342
200358	2.61107	0.00707992	UBQLN2	ubiquilin 2		223720	-2.15548	0.0240945
177636	2.61076	0.00844659	BMP7	bone morphogenetic protein 7 (osteogenic protein 1)		145230	-2.15483	0.0452155	VARS	valyl-tRNA synthetase
234851	2.60928	0.00018448	LOC440577			149880	-2.154	0.00729375	TPMT	thiopurine S-methyltransferase
118382	2.60731	0.000937453	C6orf113	chromosome 6 open reading frame 113		234918	-2.15148	0.0417723
208060	2.59918	0.0108895	PLAUR	plasminogen activator, urokinase receptor		179869	-2.14876	0.00675775	SLC6A3	solute carrier family 6 (neurotransmitter transporter, dopamine), member 3
211331	2.59913	0.00126368	CD4	CD4 antigen (p55)		110210	-2.14791	0.00333869	SPIB	Spi-B transcription factor (Spi-1/PU.1 related)
194352	2.59816	0.00741315	UBXD1	UBX domain containing 1		695977	-2.14595	0.0451742	DUX2	double homeobox, 2
144218	2.59568	0.0437634	PIGT	phosphatidylinositol glycan, class T		701550	-2.14551	0.0269581
169995	2.59092	0.0239673	UNG2	uracil-DNA glycosylase 2		223980	-2.14347	0.0209727	BCOR	BCL6 co-repressor
110649	2.58849	0.0157108	TM7SF1	transmembrane 7 superfamily member 1 (upregulated in kidney)		137732	-2.14301	0.0230615	FBXL19	F-box and leucine-rich repeat protein 19
192649	2.58785	0.00345007	TSG101	tumor susceptibility gene 101		174119	-2.14198	0.026188	MT1B	metallothionein 1B (functional)
204760	2.58775	0.00684617	PSMD13	proteasome (prosome, macropain) 26S subunit, non-ATPase, 13		143287	-2.14143	0.00578931	AQP8	aquaporin 8
107347	2.58327	0.00647334	SNTB1	syntrophin, beta 1 (dystrophin-associated protein A1, 59kDa, basic component 1)		199514	-2.14046	0.0111992	NAG8
206304	2.5804	0.000170103	ZNF622	zinc finger protein 622		596935	-2.14012	0.036875
190183	2.57907	0.000354562	IFNGR1	interferon gamma receptor 1		168528	-2.13412	0.0138466	ATR	ataxia telangiectasia and Rad3 related
173876	2.57704	0.0365432	OACT2	O-acyltransferase (membrane bound) domain containing 2		176028	-2.13399	0.0377299
235813	2.57683	0.000316078				166306	-2.13388	0.0165533	PRKCI	protein kinase C, iota
111748	2.57069	0.0324912	HTRA1	HtrA serine peptidase 1		106389	-2.13304	0.0379253
135443	2.56954	0.0213138	TCEAL1	transcription elongation factor A (SII)-like 1		227182	-2.13143	0.0287513	MSL3L1	male-specific lethal 3-like 1 (Drosophila)
201587	2.5686	0.0247721	ST3GAL4	ST3 beta-galactoside alpha-2,3-sialyltransferase 4		234297	-2.13038	0.020482
136928	2.5677	0.0235043	TIGD6	tigger transposable element derived 6		133107	-2.13024	0.024682	MCF2L2	MCF.2 cell line derived transforming sequence-like 2
205933	2.56763	0.0175398	PCTK3	PCTAIRE protein kinase 3		146512	-2.12879	0.0280987	PARP4	poly (ADP-ribose) polymerase family, member 4
196962	2.56739	0.00161764	CDK5RAP3	CDK5 regulatory subunit associated protein 3		547754	-2.12799	0.00890444
152007	2.56673	0.0236841	ZNF271	zinc finger protein 271		148350	-2.1273	0.0192643	RPS8	ribosomal protein S8
120935	2.56423	0.017694	QSCN6	quiescin Q6		138397	-2.12654	0.0284986
212857	2.56014	0.0235189	BFAR	bifunctional apoptosis regulator		102341	-2.12357	0.0337586	KIAA1462	KIAA1462
111111	2.55335	0.0331934	ITPR1	inositol 1,4,5-triphosphate receptor, type 1		208272	-2.12194	0.0388359	CDC45L	CDC45 cell division cycle 45-like (S. cerevisiae)
134692	2.55073	0.023664	TIMP1	TIMP metallopeptidase inhibitor 1		116958	-2.12011	0.0469104	SLC5A4	solute carrier family 5 (low affinity glucose cotransporter), member 4
198313	2.55068	0.0271174				232916	-2.11911	0.00399715
173526	2.55039	0.000206179	YIPF3	Yip1 domain family, member 3		180218	-2.11894	0.00975709	DRIM
152666	2.55035	0.0356293	LAYN	layilin		214597	-2.11849	0.0126593	TRH	thyrotropin-releasing hormone
137001	2.54964	0.00997177	LRIG3	leucine-rich repeats and immunoglobulin-like domains 3		196448	-2.11799	0.00505397
110562	2.5485	0.0108758	POP4	processing of precursor 4, ribonuclease P/MRP subunit (S. cerevisiae)		221463	-2.11463	0.0270215	VWA2	von Willebrand factor A domain containing 2
179538	2.54748	0.0332014	TIMP3	TIMP metallopeptidase inhibitor 3 (Sorsby fundus dystrophy, pseudoinflammatory)		143556	-2.11346	0.0158272	HSF4	heat shock transcription factor 4
213863	2.54661	0.0262967	ECHDC1	enoyl Coenzyme A hydratase domain containing 1		132134	-2.11202	0.00858866	TNFRSF13C	tumor necrosis factor receptor superfamily, member 13C
137024	2.54205	0.00807348	THEM2	thioesterase superfamily member 2		318897	-2.11095	0.000460269
122888	2.54177	0.0187438				702243	-2.11088	0.00405303
186894	2.53843	0.0314735	SDCCAG33	serologically defined colon cancer antigen 33		160611	-2.10507	0.00839289
176248	2.53772	0.000611135	HARS	histidyl-tRNA synthetase		103252	-2.10221	0.0405739
195167	2.5366	0.0289156	TMEM49	transmembrane protein 49		225107	-2.10189	0.0444122
206935	2.53482	0.0120884	MRPL23	mitochondrial ribosomal protein L23		199830	-2.10162	0.00037967	C1orf151	chromosome 1 open reading frame 151
100259	2.53464	0.0126031	FLJ21839			236899	-2.10088	0.0303218
148730	2.51247	0.00956827	REM1	RAS (RAD and GEM)-like GTP-binding 1		151200	-2.10001	0.0026853
224373	2.50869	0.0260234	ZNF278	zinc finger protein 278		148494	-2.09977	0.03918	ADRA2C	adrenergic, alpha-2C-, receptor
197007	2.50867	0.011544				162520	-2.09939	0.0314456	GDPD3	glycerophosphodiester phosphodiesterase domain containing 3
202509	2.50771	0.0293924	IGFBP1	insulin-like growth factor binding protein 1		230838	-2.09873	0.0242295
165998	2.50502	0.0181209	NCSTN	nicastrin		236351	-2.0967	0.021865
175324	2.50408	0.000571291	GAPDH	glyceraldehyde-3-phosphate dehydrogenase		541841	-2.09562	0.0362583
114785	2.50386	0.00882204	SH3BGRL2	SH3 domain binding glutamic acid-rich protein like 2		170593	-2.09459	0.0165727	ELMO3	engulfment and cell motility 3 (ced-12 homolog, C. elegans)
145835	2.5027	0.0114136	NUDT16L1	nudix (nucleoside diphosphate linked moiety X)-type motif 16-like 1		525049	-2.09386	0.000160048
179709	2.50213	0.0054082	MTERFD2	MTERF domain containing 2		206837	-2.09209	0.0038603
144329	2.50185	0.0328653	SLD5			164911	-2.08791	0.0494496	RAC2	ras-related C3 botulinum toxin substrate 2 (rho family, small GTP binding protein Rac2)
147729	2.50135	0.0472708	GKAP1	G kinase anchoring protein 1		147381	-2.08773	0.0294438	AOC2	amine oxidase, copper containing 2 (retina-specific)
177411	2.4998	0.0285455				210956	-2.08735	0.021406	FARP2	FERM, RhoGEF and pleckstrin domain protein 2
127019	2.49853	0.0300439	GMPR	guanosine monophosphate reductase		170545	-2.08285	0.0164355	OVOS2
134481	2.49481	0.00568455				123649	-2.08168	0.00442714
201581	2.49264	0.0402551	OAS1	2',5'-oligoadenylate synthetase 1, 40/46kDa		157269	-2.08138	0.044243	SLC5A10	solute carrier family 5 (sodium/glucose cotransporter), member 10
199498	2.4922	0.0156067	ZNF323	zinc finger protein 323		103907	-2.07963	0.0002752	TMEM20	transmembrane protein 20
203073	2.49148	0.0215895				196635	-2.07725	0.0306776	NPHS2	nephrosis 2, idiopathic, steroid-resistant (podocin)
223400	2.491	0.000767459	ATPAF2	ATP synthase mitochondrial F1 complex assembly factor 2		704185	-2.07691	0.00203231	C17orf57	chromosome 17 open reading frame 57
149399	2.48932	0.00500594	MGC29898			201653	-2.07644	0.0068787
127182	2.4881	0.000312861	NPM1|RARA|ALK	nucleophosmin (nucleolar phosphoprotein B23, numatrin)|retinoic acid receptor, alpha|anaplastic lymphoma kinase (Ki-1)		130312	-2.07637	0.0440284	GRPEL2	GrpE-like 2, mitochondrial (E. coli)
235864	2.48629	0.0137968	LOC387745			141049	-2.07594	0.0017318	WDR75	WD repeat domain 75
139930	2.48275	0.00331761	FLJ20294			114220	-2.07545	0.0252919	VMD2L2	vitelliform macular dystrophy 2-like 2
200855	2.48026	0.00124563	CXorf44	chromosome X open reading frame 44		118495	-2.07156	0.00206431	GFM1	G elongation factor, mitochondrial 1
132156	2.48023	0.00376451	LOC90379			183190	-2.07069	0.0188499	KIFC2	kinesin family member C2
112058	2.48014	0.0187028	RAB8B	RAB8B, member RAS oncogene family		152811	-2.06969	0.000171119	OR10H5	olfactory receptor, family 10, subfamily H, member 5
213472	2.47889	0.00202817	C8orf40	chromosome 8 open reading frame 40		641625	-2.06964	0.00108153
235151	2.47834	0.0104862	LOC285544			543821	-2.06953	0.0325598	LOC286208
143290	2.47738	0.0103126	TMEM54	transmembrane protein 54		525698	-2.06881	0.0124676
181789	2.47609	0.0207047	FLJ22688			121386	-2.06852	0.00501303	MRRF	mitochondrial ribosome recycling factor
160273	2.47495	0.040705	ZADH2	zinc binding alcohol dehydrogenase, domain containing 2		164177	-2.06763	0.045912	MBTPS2	membrane-bound transcription factor peptidase, site 2
203695	2.47388	0.000876424	CTSD	cathepsin D (lysosomal aspartyl peptidase)		112937	-2.06654	0.0254867
227404	2.47312	0.0343307	NRG1	neuregulin 1		543648	-2.06482	0.000551898	ZNF600	zinc finger protein 600
131936	2.46505	0.0142119	VPS25	vacuolar protein sorting 25 (yeast)		197348	-2.06322	0.0256772
202286	2.46239	0.000600644	CRSP9	cofactor required for Sp1 transcriptional activation, subunit 9, 33kDa		195332	-2.0618	0.0279964	PSORS1C2	psoriasis susceptibility 1 candidate 2
129685	2.46003	0.0141166	CRR9			179110	-2.06004	0.00467899	RCC1	regulator of chromosome condensation 1
230940	2.45716	0.0180004	TPM1	tropomyosin 1 (alpha)		148887	-2.05732	0.0276186	LOC441076
231673	2.45398	0.00616918				167412	-2.05687	0.000592511	SR140
235699	2.45364	0.00274705				232087	-2.05465	0.0355016	LOC439930
138204	2.44874	0.0358252	MORN2	MORN repeat containing 2		126845	-2.05441	0.0207582	HAGHL	hydroxyacylglutathione hydrolase-like
118257	2.44837	0.00517255	FAM103A1	family with sequence similarity 103, member A1		171290	-2.05409	0.0394473	BLNK	B-cell linker
191441	2.44782	0.0487666	RSAD2	radical S-adenosyl methionine domain containing 2		119407	-2.05357	0.028477	NUPL1	nucleoporin like 1
155169	2.44479	0.00442542	SPDEF	SAM pointed domain containing ets transcription factor		132892	-2.05298	0.0419594	HIPK3	homeodomain interacting protein kinase 3
143113	2.44395	0.0367757	SYK	spleen tyrosine kinase		195584	-2.05285	0.00359006	SMR3A	submaxillary gland androgen regulated protein 3 homolog A (mouse)
231164	2.44258	0.00135006	TMCC1	transmembrane and coiled-coil domain family 1		121526	-2.05255	0.0231679	LOC150223
145990	2.44118	0.0111816	TGFB1I1	transforming growth factor beta 1 induced transcript 1		112020	-2.05241	0.00116902	OTOG	otogelin
173244	2.43797	0.0164032	CRHR1	corticotropin releasing hormone receptor 1		712385	-2.05095	0.00250748
144171	2.43594	0.00247402	STXBP3	syntaxin binding protein 3		224882	-2.04822	0.00987511	ALDH4A1	aldehyde dehydrogenase 4 family, member A1
201205	2.43563	0.007868	C9orf52	chromosome 9 open reading frame 52		149525	-2.04633	0.0299049	TMEM1	transmembrane protein 1
218206	2.43387	0.0180866	TRIM25	tripartite motif-containing 25		705462	-2.04574	0.0426225
140341	2.43344	0.0281091	PANK3	pantothenate kinase 3		121345	-2.0428	0.0336138	FLJ39660
177655	2.42645	0.000129879	MGST3	microsomal glutathione S-transferase 3		141343	-2.04062	0.00347096	KIFC1	kinesin family member C1
220747	2.42622	0.00368468	IHPK2	inositol hexaphosphate kinase 2		359301	-2.04032	0.00225742
112488	2.42392	0.0324289	NRIP1	nuclear receptor interacting protein 1		135507	-2.03964	0.0079132	CLOCK	clock homolog (mouse)
197406	2.42154	0.0149576	TBC1D19	TBC1 domain family, member 19		141973	-2.03757	0.0117627	FBS1	fibrosin 1
196539	2.42075	0.0134713	PRIM2A	primase, polypeptide 2A, 58kDa		171719	-2.03701	0.0219951	NBPF10|NBPF15	neuroblastoma breakpoint family, member 10|neuroblastoma breakpoint family, member 15
196184	2.41965	0.00438923				114403	-2.03644	0.00743288
111981	2.41719	0.00336331	FAT2	FAT tumor suppressor homolog 2 (Drosophila)		185108	-2.0342	0.010549	DUSP26	dual specificity phosphatase 26 (putative)
162115	2.41511	0.0212744				219174	-2.03345	0.0260952	TAOK2	TAO kinase 2
704069	2.41317	0.00268031	SATL1	spermidine/spermine N1-acetyl transferase-like 1		509721	-2.03262	0.0447711
122028	2.41076	0.0198737	ETF1	eukaryotic translation termination factor 1		123012	-2.02766	0.0461205	JAG1	jagged 1 (Alagille syndrome)
229206	2.40981	0.012929	HADHA	hydroxyacyl-Coenzyme A dehydrogenase/3-ketoacyl-Coenzyme A thiolase/enoyl-Coenzyme A hydratase (trifunctional protein), alpha subunit		213789	-2.02591	0.000559429	HP1BP3	heterochromatin protein 1, binding protein 3
144634	2.40861	0.0426121	GTPBP2	GTP binding protein 2		150962	-2.02384	0.0491265	C20orf26	chromosome 20 open reading frame 26
139755	2.40706	0.0140707	KCTD1	potassium channel tetramerisation domain containing 1		230035	-2.02152	0.0310381
201466	2.40656	0.00183933	HSPA8	heat shock 70kDa protein 8		134330	-2.01877	0.0404739	SEMA3B	sema domain, immunoglobulin domain (Ig), short basic domain, secreted, (semaphorin) 3B
103644	2.40231	0.0394036	C14orf129	chromosome 14 open reading frame 129		151115	-2.01674	0.0153629
134614	2.40199	0.000160685	LOC133957			194223	-2.01655	0.00831726
185819	2.39968	0.0194344				152450	-2.01635	0.00548967	ZFYVE19	zinc finger, FYVE domain containing 19
170572	2.39899	0.0243357	TMEM64	transmembrane protein 64		160495	-2.01211	0.0248108
175244	2.39862	0.00490433	MYL5	myosin, light polypeptide 5, regulatory		118799	-2.00902	0.0204043	ZFP57	zinc finger protein 57 homolog (mouse)
206883	2.39845	0.00717026	SMAD5	SMAD, mothers against DPP homolog 5 (Drosophila)		230909	-2.00822	0.0171998	ACAA1	acetyl-Coenzyme A acyltransferase 1 (peroxisomal 3-oxoacyl-Coenzyme A thiolase)
150564	2.39658	0.00511613	FLJ20625			222664	-2.00817	0.00630272	USP48	ubiquitin specific peptidase 48
123868	2.3964	0.0315042	PPIL4	peptidylprolyl isomerase (cyclophilin)-like 4		466024	-2.006	0.00186452
101862	2.3948	0.0130541	MST150			210021	-2.00597	0.0108029
128305	2.39335	0.0375226	PFKP	phosphofructokinase, platelet		192662	-2.00552	0.0358703	OR52N4	olfactory receptor, family 52, subfamily N, member 4
167151	2.39304	0.0358328	HOXB2	homeobox B2		186044	-2.00453	0.0197336	CD163L1	CD163 antigen-like 1
179802	2.39108	0.0273721	NUDT6	nudix (nucleoside diphosphate linked moiety X)-type motif 6		205339	-2.00388	0.046521	CXorf21	chromosome X open reading frame 21
155905	2.38999	0.0124201	SLC29A1	solute carrier family 29 (nucleoside transporters), member 1		670634	-2.00292	0.0369921
157732	2.38898	0.0390792	C19orf27	chromosome 19 open reading frame 27
107434	2.38538	0.00777011	KAL1	Kallmann syndrome 1 sequence
116834	2.3828	0.0134044	SMPDL3B	sphingomyelin phosphodiesterase, acid-like 3B
125267	2.38085	0.00191842	GPKOW	G patch domain and KOW motifs
115141	2.37796	0.022512	COG7	component of oligomeric golgi complex 7
201689	2.3777	0.038935	ACTA2	actin, alpha 2, smooth muscle, aorta
234418	2.37433	0.0493243	PDCD8	programmed cell death 8 (apoptosis-inducing factor)
109385	2.37423	0.020871	HLA-C|HLA-B	major histocompatibility complex, class I, C|major histocompatibility complex, class I, B
199932	2.3736	0.00375876	FLJ21103
146548	2.37058	0.0149513	SMARCB1	SWI/SNF related, matrix associated, actin dependent regulator of chromatin, subfamily b, member 1
151816	2.36786	0.0135486	TULP4	tubby like protein 4
219074	2.36485	0.00358874	ILF3	interleukin enhancer binding factor 3, 90kDa
180932	2.36438	0.00731757	SLC25A26	solute carrier family 25, member 26
138302	2.36408	0.0016421	LOC401308
139818	2.36277	0.0243479	YIF1A	Yip1 interacting factor homolog A (S. cerevisiae)
195075	2.36273	0.000505389	ARMCX1	armadillo repeat containing, X-linked 1
200998	2.36119	0.000499228	ZDHHC4	zinc finger, DHHC-type containing 4
151844	2.36015	0.00172413	ATP6V1B2	ATPase, H+ transporting, lysosomal 56/58kDa, V1 subunit B, isoform 2
163732	2.35966	0.0136376	MTHFD1L	methylenetetrahydrofolate dehydrogenase (NADP+ dependent) 1-like
111179	2.35911	0.00492548	ADRM1	adhesion regulating molecule 1
229459	2.35636	0.0216596
182241	2.35553	0.0352309	AGPAT2	1-acylglycerol-3-phosphate O-acyltransferase 2 (lysophosphatidic acid acyltransferase, beta)
137923	2.35389	0.0116062	LASS2	LAG1 longevity assurance homolog 2 (S. cerevisiae)
149145	2.35319	0.00210254	WDR34	WD repeat domain 34
144730	2.35266	0.00150539	FAM57A	family with sequence similarity 57, member A
137986	2.35125	0.00784674	IL13RA1	interleukin 13 receptor, alpha 1
180215	2.34755	0.0140074	RAE1	RAE1 RNA export 1 homolog (S. pombe)
172773	2.34685	0.0337198	ARRDC3	arrestin domain containing 3
161850	2.34523	0.000268237	C18orf10	chromosome 18 open reading frame 10
213797	2.34452	0.00154571
208289	2.34417	0.0327182	CA12	carbonic anhydrase XII
195528	2.34367	0.0374642	NEURL2	neuralized-like 2 (Drosophila)
131480	2.34246	0.0132601	HNRPLL	heterogeneous nuclear ribonucleoprotein L-like
165585	2.34093	0.00133008	NDUFS2	NADH dehydrogenase (ubiquinone) Fe-S protein 2, 49kDa (NADH-coenzyme Q reductase)
194691	2.33984	0.0255919	LOC93622
234421	2.33983	0.00873771
196595	2.33712	0.015561	GPX3	glutathione peroxidase 3 (plasma)
177045	2.33678	0.0493573
101044	2.33523	0.0081683	ZNF454	zinc finger protein 454
109394	2.3346	0.0121408	CCDC49	coiled-coil domain containing 49
211861	2.33358	0.0454687	CCL11	chemokine (C-C motif) ligand 11
230454	2.33239	0.0216898
175262	2.33165	0.00757494	XRN2	5'-3' exoribonuclease 2
160573	2.33076	0.0128443	COQ6	coenzyme Q6 homolog (yeast)
105435	2.32842	0.0104139	C20orf22	chromosome 20 open reading frame 22
192518	2.32798	0.00310565	RAB24	RAB24, member RAS oncogene family
215824	2.32683	0.00455299	MRPL2	mitochondrial ribosomal protein L2
182141	2.32295	0.0416967	SLC7A8	solute carrier family 7 (cationic amino acid transporter, y+ system), member 8
232099	2.3221	0.0254038
177811	2.31858	0.00221307	E2F5	E2F transcription factor 5, p130-binding
159880	2.31837	0.00197775
157216	2.31568	0.0010283	DECR1	2,4-dienoyl CoA reductase 1, mitochondrial
108526	2.31556	0.017524	C16orf45	chromosome 16 open reading frame 45
153533	2.31352	0.010292	C1orf156	chromosome 1 open reading frame 156
117418	2.30583	0.0191605	SEMA4C	sema domain, immunoglobulin domain (Ig), transmembrane domain (TM) and short cytoplasmic domain, (semaphorin) 4C
150965	2.30437	0.00327843	POMGNT1	protein O-linked mannose beta1,2-N-acetylglucosaminyltransferase
194079	2.30371	5.43118e-05	PPIE	peptidylprolyl isomerase E (cyclophilin E)
139178	2.30209	0.0471588	KIAA0753	KIAA0753
187463	2.30016	0.0104584	RAB7	RAB7, member RAS oncogene family
187518	2.29972	0.000709679	RBM22	RNA binding motif protein 22
146990	2.29633	0.00425339	SLC2A1	solute carrier family 2 (facilitated glucose transporter), member 1
185846	2.29513	0.0340164	CORO1B	coronin, actin binding protein, 1B
161804	2.2938	0.0255295	DMAP1	DNA methyltransferase 1 associated protein 1
233220	2.28557	0.0435543
122957	2.28282	0.0177747	EIF3S4	eukaryotic translation initiation factor 3, subunit 4 delta, 44kDa
160032	2.28209	0.0268047	KIAA1908
207916	2.282	0.0213056	HOP
212890	2.28199	0.0293323	FRAT2	frequently rearranged in advanced T-cell lymphomas 2
107513	2.2814	0.00847589	SYNJ1	synaptojanin 1
134459	2.28137	0.0123309	RAB20	RAB20, member RAS oncogene family
205644	2.28102	0.0390741	ACOT4	acyl-CoA thioesterase 4
143388	2.27885	0.00212839	PLD3	phospholipase D family, member 3
151510	2.27867	0.000544897
118127	2.27674	0.00146643	NME6	non-metastatic cells 6, protein expressed in (nucleoside-diphosphate kinase)
219917	2.27674	0.0271469
148637	2.27486	0.019191	MYO1C	myosin IC
164864	2.27477	0.0194415	ACOT11	acyl-CoA thioesterase 11
186340	2.27438	0.0177471	DHRS7B	dehydrogenase/reductase (SDR family) member 7B
173532	2.27257	0.0294453
132288	2.27134	0.0473356	SLC20A2	solute carrier family 20 (phosphate transporter), member 2
235139	2.27126	0.0089076
178379	2.27088	0.015038	GLB1	galactosidase, beta 1
194071	2.27081	0.00294879	DKFZp686E2433
199900	2.27057	0.0309291	RBM7	RNA binding motif protein 7
100901	2.26889	0.00807157
189985	2.26698	0.0361591	CBR4
113737	2.26624	0.0115629	TRIB3	tribbles homolog 3 (Drosophila)
129885	2.26561	0.00587317	MTA3	metastasis associated 1 family, member 3
118423	2.26511	0.00741956	ATP6V1C1	ATPase, H+ transporting, lysosomal 42kDa, V1 subunit C, isoform 1
186550	2.26455	0.018283	DHODH	dihydroorotate dehydrogenase
224478	2.26422	0.0366581	ARHGEF7	Rho guanine nucleotide exchange factor (GEF) 7
193902	2.26359	0.00474931	ZDHHC3	zinc finger, DHHC-type containing 3
118825	2.2632	0.025369	DKFZp761B107
110914	2.26275	0.0164075	SLC25A11	solute carrier family 25 (mitochondrial carrier; oxoglutarate carrier), member 11
231497	2.26209	0.00550134
139075	2.26139	0.00987332	PHLPP	PH domain and leucine rich repeat protein phosphatase
184959	2.25825	0.0166333	MOCS3	molybdenum cofactor synthesis 3
214774	2.25692	0.0232209	UQCRFS1	ubiquinol-cytochrome c reductase, Rieske iron-sulfur polypeptide 1
179836	2.25679	0.0191588	LGALS3|GALIG	lectin, galactoside-binding, soluble, 3 (galectin 3)
194266	2.25595	0.00893098	SMUG1	single-strand-selective monofunctional uracil-DNA glycosylase 1
183097	2.25416	0.0156567	KCTD15	potassium channel tetramerisation domain containing 15
213081	2.25246	0.00507395	PEX3	peroxisomal biogenesis factor 3
163290	2.24938	0.0290471	SERHL2|SERHL	serine hydrolase-like 2|serine hydrolase-like
149497	2.24873	0.0102906	FLJ11773
118122	2.24786	0.0315098	SITPEC
115708	2.24702	8.55667e-05	KIF2	kinesin heavy chain member 2
184033	2.2463	0.0194518	MAP3K7	mitogen-activated protein kinase kinase kinase 7
174906	2.2459	0.0141966	IPO13	importin 13
188604	2.24571	0.00164567	WDR73	WD repeat domain 73
168564	2.24482	0.0188889	ASB8	ankyrin repeat and SOCS box-containing 8
164845	2.24403	0.0237719	PCDH1	protocadherin 1 (cadherin-like 1)
195690	2.24252	0.0193165	DTWD1	DTW domain containing 1
168716	2.2415	0.0215817
178164	2.23939	0.042068	C1orf172	chromosome 1 open reading frame 172
268194	2.23723	0.0220326
705915	2.23652	0.0302736	LOC376475|LOC349338|FLJ25222|MGC52000
117474	2.23637	0.00690323	CLK2	CDC-like kinase 2
202371	2.23588	0.04534	GDPD1	glycerophosphodiester phosphodiesterase domain containing 1
143873	2.23583	0.0152756	MRPL50	mitochondrial ribosomal protein L50
173287	2.23249	0.0193489	DKFZP434B172
175422	2.23062	0.0413744	SKB1	SKB1 homolog (S. pombe)
225916	2.2283	0.0357213	GSTM4	glutathione S-transferase M4
709890	2.22807	0.03237	MGC70924
125972	2.2275	0.0164024	GLT28D1	glycosyltransferase 28 domain containing 1
104774	2.22711	0.0322892	MRS2L	MRS2-like, magnesium homeostasis factor (S. cerevisiae)
209621	2.2234	0.0106516	APEX2	APEX nuclease (apurinic/apyrimidinic endonuclease) 2
234954	2.22172	0.00806108	RPL17	ribosomal protein L17
124734	2.22145	0.00858374	SNX4	sorting nexin 4
189081	2.22073	0.000119403	TUSC2	tumor suppressor candidate 2
104955	2.22008	0.0359829	SPAG7	sperm associated antigen 7
150810	2.21898	0.0115783	LARP6	La ribonucleoprotein domain family, member 6
137281	2.21787	0.0237464	CAPZA1	capping protein (actin filament) muscle Z-line, alpha 1
149340	2.21767	0.00837016	PKN1	protein kinase N1
161432	2.21653	0.0166677	FAM63B	family with sequence similarity 63, member B
158513	2.21503	0.00965644	PRDX2	peroxiredoxin 2
214185	2.21388	0.00164608	YWHAQ	tyrosine 3-monooxygenase/tryptophan 5-monooxygenase activation protein, theta polypeptide
151550	2.21048	0.00972831	KIAA0196	KIAA0196
201278	2.21045	0.0383117
236913	2.21026	0.000240647
178139	2.2096	0.00490928	RGS19	regulator of G-protein signalling 19
230564	2.20848	0.0222798	FADS6	fatty acid desaturase domain family, member 6
229144	2.20805	0.00709725
121011	2.20778	0.00393524	ASNA1	arsA arsenite transporter, ATP-binding, homolog 1 (bacterial)
163543	2.20733	0.00118191	PLEKHG3	pleckstrin homology domain containing, family G (with RhoGef domain) member 3
125848	2.20488	0.032548	TUBA1	tubulin, alpha 1 (testis specific)
196532	2.20304	0.00198859	MAGED2	melanoma antigen family D, 2
142563	2.20289	0.0226395	MAPK3	mitogen-activated protein kinase 3
220901	2.20244	0.0435344	MGC34824
169226	2.20174	0.00895029	THBS2	thrombospondin 2
163961	2.20017	0.0369442	F25965
111166	2.19989	0.0246521	HLA-C	major histocompatibility complex, class I, C
121776	2.19624	0.0167085	SENP7	SUMO1/sentrin specific peptidase 7
178237	2.19449	0.00053674
116867	2.19343	0.00260803	MTCBP-1
219316	2.19157	0.0266437	C21orf70	chromosome 21 open reading frame 70
229491	2.19151	0.0281496	LOC285535
138744	2.19128	0.000239125	C14orf100	chromosome 14 open reading frame 100
135952	2.18838	0.0131272	FBXL6	F-box and leucine-rich repeat protein 6
116108	2.18741	0.0225568	LOC90580
233909	2.18514	0.000421879
112025	2.18487	0.028084	C9orf23	chromosome 9 open reading frame 23
158142	2.1838	0.00545522	WFS1	Wolfram syndrome 1 (wolframin)
162743	2.18231	0.0418152	C20orf24	chromosome 20 open reading frame 24
181329	2.18199	0.00409702	KLHL17	kelch-like 17 (Drosophila)
160503	2.18195	0.0115363	BFSP1	beaded filament structural protein 1, filensin
103520	2.181	0.0490808	HRMT1L3	HMT1 hnRNP methyltransferase-like 3 (S. cerevisiae)
194409	2.17993	0.00379078	ACSS2	acyl-CoA synthetase short-chain family member 2
204151	2.17945	0.0277952	HK2	hexokinase 2
117568	2.17681	0.0281642	SNF8	SNF8, ESCRT-II complex subunit, homolog (S. cerevisiae)
102162	2.17576	0.0221376	FLJ10661
162018	2.17346	0.0386759
197752	2.16862	0.0136639
105266	2.16859	0.00619508	SYNJ2BP	synaptojanin 2 binding protein
199204	2.16855	0.0187523	AIG1	androgen-induced 1
152148	2.16497	0.0204888	DNAJB5	DnaJ (Hsp40) homolog, subfamily B, member 5
188605	2.16463	0.00186301	SNAP23	synaptosomal-associated protein, 23kDa
215995	2.15891	0.0290562	LOH12CR1	loss of heterozygosity, 12, chromosomal region 1
172153	2.15832	0.00487082	ZNHIT4	zinc finger, HIT type 4
101908	2.15825	0.00965626
203712	2.15753	0.0273943	TST	thiosulfate sulfurtransferase (rhodanese)
127803	2.15746	0.0272827	PLEKHA5	pleckstrin homology domain containing, family A member 5
157534	2.15488	0.00950325	THAP11	THAP domain containing 11
103793	2.15477	0.00620454	FAHD1	fumarylacetoacetate hydrolase domain containing 1
177535	2.1517	0.00275642	ACTN1	actinin, alpha 1
163709	2.15153	0.0167431	ZNF193	zinc finger protein 193
149988	2.15124	0.023321	POMC	proopiomelanocortin (adrenocorticotropin/ beta-lipotropin/ alpha-melanocyte stimulating hormone/ beta-melanocyte stimulating hormone/ beta-endorphin)
402878	2.15116	0.019791	SRP54	signal recognition particle 54kDa
169526	2.15064	0.000196914	SPON2	spondin 2, extracellular matrix protein
178828	2.15027	0.0392907	LU	Lutheran blood group (Auberger b antigen included)
229680	2.1502	0.00945896
161888	2.15003	0.0376603	FLJ22709
198155	2.14793	0.0114662	DYNC2LI1	dynein, cytoplasmic 2, light intermediate chain 1
188400	2.14744	0.00823669	ST8SIA2	ST8 alpha-N-acetyl-neuraminide alpha-2,8-sialyltransferase 2
102627	2.147	0.00399648	PEX7	peroxisomal biogenesis factor 7
112476	2.14527	0.0438558	RRAGD	Ras-related GTP binding D
217282	2.14463	0.0319577	EIF4E	eukaryotic translation initiation factor 4E
158894	2.14401	0.00121076	RRAGB	Ras-related GTP binding B
188934	2.14385	0.0229649	NMB	neuromedin B
204511	2.1433	0.0312933	SCARB1	scavenger receptor class B, member 1
204405	2.13845	0.00239537	FIGNL1	fidgetin-like 1
112941	2.13759	0.0386675	ENG	endoglin (Osler-Rendu-Weber syndrome 1)
228935	2.13684	0.0388059
180695	2.13584	0.00026411	SAMM50	sorting and assembly machinery component 50 homolog (S. cerevisiae)
157439	2.13568	0.0340838	MGC16028
237000	2.13489	0.0256372
184788	2.13433	0.0119112	C16orf9	chromosome 16 open reading frame 9
197256	2.1325	0.0147996	MGC11332
188969	2.13078	0.0326037	WFDC1	WAP four-disulfide core domain 1
120463	2.13048	0.00114393	VDAC1	voltage-dependent anion channel 1
156421	2.12802	0.000128782	RDH11	retinol dehydrogenase 11 (all-trans and 9-cis)
191777	2.12638	0.0381782
204620	2.12631	0.00277044	RABGGTB	Rab geranylgeranyltransferase, beta subunit
125348	2.12446	0.0312902	USP51	ubiquitin specific peptidase 51
168754	2.12341	0.0184604	OSBPL1A	oxysterol binding protein-like 1A
102732	2.12118	0.00575934	LRPAP1	low density lipoprotein receptor-related protein associated protein 1
215471	2.11995	4.88636e-05	GPS1	G protein pathway suppressor 1
220892	2.11929	0.0192549
142235	2.11868	0.00153272	ENO2	enolase 2 (gamma, neuronal)
132759	2.11646	0.00692984	PLCE1	phospholipase C, epsilon 1
209436	2.11558	0.00449335	FLAD1	Fad1, flavin adenine dinucleotide synthetase, homolog (yeast)
206853	2.11486	0.0192464	LASS5	LAG1 longevity assurance homolog 5 (S. cerevisiae)
153942	2.11351	0.0276684	PIGQ	phosphatidylinositol glycan, class Q
189197	2.11152	0.0376082	ARPC1A	actin related protein 2/3 complex, subunit 1A, 41kDa
134023	2.11102	0.00381472	GTF2B	general transcription factor IIB
223270	2.11028	0.00731355	BTF3L4	basic transcription factor 3-like 4
162719	2.10943	0.0306836	SCAND1	SCAN domain containing 1
146810	2.1088	0.0288199	FLJ14721
235557	2.10876	0.00832716	LOC391613
200155	2.10789	0.00977002	COL4A5	collagen, type IV, alpha 5 (Alport syndrome)
182445	2.10785	0.0292995	RAB5B	RAB5B, member RAS oncogene family
232153	2.10704	0.0464025	IDH2	isocitrate dehydrogenase 2 (NADP+), mitochondrial
145520	2.10666	0.0141229	RAB11A	RAB11A, member RAS oncogene family
182997	2.10421	0.0326162	TOMM70A	translocase of outer mitochondrial membrane 70 homolog A (yeast)
204834	2.10408	0.00347205	MGC33214
103451	2.10359	0.00865846	CHMP1B	chromatin modifying protein 1B
107117	2.10322	0.0115483	GLA	galactosidase, alpha
194547	2.10289	0.0193813	TMEM9	transmembrane protein 9
183334	2.10159	0.0151546
227398	2.10118	0.0189217	LAMP2	lysosomal-associated membrane protein 2
196002	2.10071	6.50921e-05	MORF4	mortality factor 4
169496	2.10049	0.0131868	MGC3207
158664	2.10032	0.0322309	XAB2	XPA binding protein 2
149248	2.09955	0.0462249	HAGH	hydroxyacylglutathione hydrolase
235408	2.09748	0.0189448
178980	2.09691	0.0108285	C20orf55	chromosome 20 open reading frame 55
225275	2.09687	0.000200141	MORF4L1	mortality factor 4 like 1
154434	2.09655	0.0419835	AMIGO2	adhesion molecule with Ig-like domain 2
227323	2.09623	0.0133214	VEGFB	vascular endothelial growth factor B
122528	2.096	0.00675475	FGD1	FYVE, RhoGEF and PH domain containing 1 (faciogenital dysplasia)
153981	2.09307	0.016533	KIAA0319L	KIAA0319-like
174972	2.09273	0.0213299
125666	2.09179	0.0028366	ASAH1	N-acylsphingosine amidohydrolase (acid ceramidase) 1
173312	2.09115	0.0445369	PDE4DIP	phosphodiesterase 4D interacting protein (myomegalin)
154839	2.08996	0.0330282	APBB1	amyloid beta (A4) precursor protein-binding, family B, member 1 (Fe65)
103463	2.0896	0.0328317	PEX16	peroxisomal biogenesis factor 16
107679	2.08951	0.0377407	C6orf192	chromosome 6 open reading frame 192
134095	2.08841	0.048533	SLCO2B1	solute carrier organic anion transporter family, member 2B1
212772	2.08761	0.00214052	KLHL2	kelch-like 2, Mayven (Drosophila)
191061	2.08754	0.0055736	RBM3|NEGR1	RNA binding motif (RNP1, RRM) protein 3|neuronal growth regulator 1
189584	2.08666	0.000245525	LOC619208
228286	2.08605	1.63897e-05
163244	2.08474	0.0117181	SAR1B	SAR1 gene homolog B (S. cerevisiae)
120637	2.08374	0.0207688	FAM60A	family with sequence similarity 60, member A
122437	2.08147	0.0102288	ATP6AP1	ATPase, H+ transporting, lysosomal accessory protein 1
183721	2.081	0.0287577	C6orf68|LOC389850	chromosome 6 open reading frame 68
115018	2.08098	0.00042051
121075	2.07872	0.00984715	STK16	serine/threonine kinase 16
167549	2.07664	0.00261851	LMBRD1	LMBR1 domain containing 1
219348	2.07651	0.0160278	CTA-126B4.3
182661	2.07636	0.0241524	FLJ10404
166163	2.07442	0.017818	HLA-E	major histocompatibility complex, class I, E
125730	2.0743	0.045221	SPOCK1	sparc/osteonectin, cwcv and kazal-like domains proteoglycan (testican) 1
119283	2.07275	0.00869416	PYCR1	pyrroline-5-carboxylate reductase 1
144660	2.07163	0.022026	TSPAN4	tetraspanin 4
114206	2.07063	0.0248691	SLC9A3R1	solute carrier family 9 (sodium/hydrogen exchanger), member 3 regulator 1
104157	2.06906	0.0132176	PEMT	phosphatidylethanolamine N-methyltransferase
180233	2.06833	0.00784891	POLR2K	polymerase (RNA) II (DNA directed) polypeptide K, 7.0kDa
230930	2.06606	0.042762
182884	2.06424	0.0137162	ZNF223	zinc finger protein 223
154897	2.06212	0.00340203	SLC2A4RG	SLC2A4 regulator
106681	2.06012	0.000884093
100840	2.0599	0.00366871	BLVRA	biliverdin reductase A
172755	2.05856	0.000798968	ZNHIT3	zinc finger, HIT type 3
183645	2.05851	0.00983392	ACTC	actin, alpha, cardiac muscle
165842	2.0558	0.027922	GPAA1	glycosylphosphatidylinositol anchor attachment protein 1 homolog (yeast)
236864	2.05564	0.0189643
192552	2.05425	0.0208247	TXNL1	thioredoxin-like 1
200644	2.05367	0.0212984	COQ7	coenzyme Q7 homolog, ubiquinone (yeast)
198709	2.05252	0.0388016	ACAD8	acyl-Coenzyme A dehydrogenase family, member 8
211912	2.05216	0.00378867	FMNL2	formin-like 2
213008	2.04892	0.00706136	MFAP1	microfibrillar-associated protein 1
214599	2.04884	0.0272341	SLC25A24	solute carrier family 25 (mitochondrial carrier; phosphate carrier), member 24
157804	2.04536	0.0101337	RBM30	RNA binding motif protein 30
161087	2.04383	0.000284089	LOC392549
127597	2.04327	0.00092497	PTX1
207167	2.04201	0.00753334	CHMP2B	chromatin modifying protein 2B
156167	2.04147	0.0068945	CSDA	cold shock domain protein A
126954	2.04119	0.021354	MICALCL	MICAL C-terminal like
175030	2.04033	0.0321939	LOC51035
127718	2.03905	0.0292382	LPHN1	latrophilin 1
196427	2.03877	0.00164783	GPR108	G protein-coupled receptor 108
108602	2.03877	0.0260164	DNAJB2	DnaJ (Hsp40) homolog, subfamily B, member 2
136572	2.03696	0.00675001	ATF6	activating transcription factor 6
227270	2.0365	0.0217158	ARHGAP8|LOC553158	Rho GTPase activating protein 8
212025	2.03503	0.0130914	CTSF	cathepsin F
130306	2.03393	0.0302928	MGC39827
214124	2.03311	0.0146814	VDAC3	voltage-dependent anion channel 3
215744	2.03307	0.0303081	OTUB1	OTU domain, ubiquitin aldehyde binding 1
152164	2.03246	0.00417655	TAF11	TAF11 RNA polymerase II, TATA box binding protein (TBP)-associated factor, 28kDa
207571	2.02719	0.0336237	HSPA12A	heat shock 70kDa protein 12A
109347	2.02686	0.0115348	LOC388955
189433	2.02641	0.00697412	GPRASP2	G protein-coupled receptor associated sorting protein 2
131558	2.02612	0.00236874	FAT	FAT tumor suppressor homolog 1 (Drosophila)
226488	2.02611	0.00242691	TSNAX	translin-associated factor X
164480	2.02567	0.0301701	PCYT2	phosphate cytidylyltransferase 2, ethanolamine
105532	2.02556	0.0261656	LOC126987
179862	2.02469	0.0474749	FLJ12949
127990	2.02436	0.0118148	COMMD8	COMM domain containing 8
216597	2.02381	0.03603	P2RX4	purinergic receptor P2X, ligand-gated ion channel, 4
126299	2.02378	0.0496587	PAK6	p21(CDKN1A)-activated kinase 6
156858	2.02223	0.0142417	RFNG	radical fringe homolog (Drosophila)
184486	2.02059	0.0167411	NDUFB6	NADH dehydrogenase (ubiquinone) 1 beta subcomplex, 6, 17kDa
183627	2.02058	0.00421294	SNX1	sorting nexin 1
177717	2.02022	0.0223923	PPCS	phosphopantothenoylcysteine synthetase
128883	2.01977	0.0119376	EBNA1BP2	EBNA1 binding protein 2
101654	2.01851	0.0359533	NRL	neural retina leucine zipper
158006	2.01845	0.0265985
152328	2.01837	0.00697318	GSS	glutathione synthetase
195648	2.016	0.016652
217302	2.01566	0.0401405	NUP98	nucleoporin 98kDa
235242	2.01555	0.00178057
386995	2.01307	0.0308695	FLJ14712
223627	2.0113	0.00715854
105053	2.01106	0.00710693	MNAT1	menage a trois 1 (CAK assembly factor)
190921	2.01098	0.00104534	BCAS2|DENND2C	breast carcinoma amplified sequence 2|DENN/MADD domain containing 2C
193609	2.00891	0.0265602
156554	2.00886	0.00283337	CGI-121
163129	2.00836	0.0141437	DELGEF
120075	2.00806	0.0218961	AP3M2	adaptor-related protein complex 3, mu 2 subunit
161406	2.00803	0.0295259	TPD52L2	tumor protein D52-like 2
116850	2.00742	0.0167041	MAPRE1	microtubule-associated protein, RP/EB family, member 1
196412	2.00705	0.0458095	PLEKHJ1	pleckstrin homology domain containing, family J member 1
150360	2.00683	0.0311649	MPDU1	mannose-P-dolichol utilization defect 1
180879	2.00651	0.0202711	ILVBL	ilvB (bacterial acetolactate synthase)-like
158378	2.00615	0.0313317	TMEPAI	transmembrane, prostate androgen induced RNA
206371	2.00468	0.0221776	MPZL1	myelin protein zero-like 1
208474	2.00454	0.0149162	ATG10	ATG10 autophagy related 10 homolog (S. cerevisiae)
177141	2.00453	0.0222012	KIAA0427	KIAA0427
164510	2.00432	0.030496	ALG14	asparagine-linked glycosylation 14 homolog (yeast)
203399	2.00331	0.0411326
114291	2.00203	0.04014	TIMM44	translocase of inner mitochondrial membrane 44 homolog (yeast)
120597	2.0014	0.0444808	YARS	tyrosyl-tRNA synthetase

## Sheet: Cohort 1 Funct Analysis
Upregulated Cohort 1 Genes
Biological Process	Count	P-Value	Benjamini		Molecular Function	Count	P-Value	Benjamini		Pathway (Kegg)
Cellular ketone metabolic process	44	1.9e-06	0.0047		Catalytic activity	220	0.0002	0.15		Galactose metabolism
Organic acid metabolic process	43	3.3e-06	0.0041		Protein binding	317	0.0017	0.5		Glutathione metabolism
Oxoacid metabolic process	42	6.5e-06	0.0054		Oxidoreductase activity	39	0.0033	0.59		Endocytosis
Carboxylic acid metabolic process	42	6.5e-06	0.0054		Eoenzyme binding	15	0.0043	0.59		Valine, leucine and isoleucine degradation
Monocarboxylic acid metabolic process	26	6.7e-05	0.041		NAD or NADH binding	7	0.0054	0.59		Glycolysis / Gluconeogenesis
Catabolic process	71	7.2e-05	0.035		Cofactor binding	18	0.0063	0.58		Propanoate metabolism
Interspecies interaction between organisms	24	0.00018	0.071		Acetyl-CoA C-acyltransferase activity	3	0.0069	0.56		Lysosome
Cellular lipid metabolic process	36	0.00024	0.081		Sphingosine N-acyltransferase activity	3	0.016	0.82		Sphingolipid metabolism
Lipid metabolic process	49	0.00031	0.093		C-acyltransferase activity	4	0.017	0.78		Glycosylphosphatidylinositol(GPI)-anchor biosynthesis
Cellular catabolic process	58	0.00038	0.1		Cell surface binding	5	0.017	0.76
Downregulated Cohort 1 Genes
Biological Process	Count	P-Value	Benjamini		Molecular Function	Count	P-Value	Benjamini		Pathway (Kegg)
Response to stimulus	10	0.007	0.9		Calcium ion binding	4	0.059	0.99		No Pathway Relationships
Chemical homeostasis	4	0.019	0.95		Metal ion binding	8	0.086	0.98
Cellular cation homeostasis	3	0.033	0.97		Cation binding	8	0.09	0.93
Immune response	4	0.04	0.96		Ion binding	8	0.097	0.88
Cation homeostasis	3	0.041	0.93
Homeostatic process	4	0.05	0.93
Cellular ion homeostasis	3	0.066	0.96
Cellular chemical homeostasis	3	0.068	0.94
Ion homeostasis	3	0.077	0.94
Regulation of biological quality	5	0.077	0.92
Unaltered Cohort 1 Genes
Biological Process	Count	P-Value	Benjamini		Molecular Function	Count	P-Value	Benjamini		Pathway (Kegg)
Cellular metabolic process	481	8.3e-10	2.6e-06		Protein binding	552	6e-08	5.8e-05		Oxidative phosphorylation
Primary metabolic process	494	4.7e-09	7.3e-06		Nucleoside-triphosphatase activity	75	1.7e-06	0.00083		Huntington's disease
Cellular macromolecule metabolic process	390	6.2e-09	6.4e-06		Pyrophosphatase activity	75	7e-06	0.0023		Ubiquitin mediated proteolysis
Macromolecule metabolic process	416	3.9e-08	3.1e-05		Hydrolase activity, acting on acid anhydrides, in phosphorus-containing anhydrides	75	8.2e-06	0.002		B cell receptor signaling pathway
Cellular protein metabolic process	199	7.8e-08	4.8e-05		Hydrolase activity, acting on acid anhydrides	75	9.9e-06	0.0019		Keratan sulfate biosynthesis
Metabolic process	525	4.4e-07	0.00023		Nucleotide binding	176	1.9e-05	0.0031		Vibrio cholerae infection
Organelle organization	122	1.1e-06	0.0005		RNA binding	69	4.6e-05	0.0064		Proteasome
Protein metabolic process	223	1.5e-06	0.00057		Catalytic activity	356	8.9e-05	0.011		Parkinson's disease
Proteasomal protein catabolic process	21	2e-06	0.00068		ATPase activity	38	0.00013	0.014		Alzheimer's disease
Proteasomal ubiquitin-dependent protein catabolic process	21	2e-06	0.00068		Binding	769	0.00018	0.017		Cardiac muscle contraction

## Sheet: Cohort 2
155 Genes Upregulated in Primary vs Recurrent Tumours (Cohort 2)						156 Genes Downregulated in Primary vs Recurrent (Cohort 2)
ProbeID	FC (prim/recur)	p value	Gene_Symbol	Gene_Name		ProbeID	FC (prim/recur)	p value	Gene_Symbol	Gene_Name
192893	19.9119	0.0382089	EPHA4	EPH receptor A4		165866	-16.3645	0.0474256	HBB	hemoglobin, beta
127498	12.1531	0.0168988	EFHC2	EF-hand domain (C-terminal) containing 2		196494	-11.6005	0.0346862	S100A8	S100 calcium binding protein A8 (calgranulin A)
109816	11.8934	0.045601	BMP3	bone morphogenetic protein 3 (osteogenic)		217273	-6.0322	0.00231218	ZNF218	zinc finger protein 218
111239	9.13472	0.0175301	TES	testis derived transcript (3 LIM domains)		119685	-5.48926	0.0427793	MT1X	metallothionein 1X
137136	8.96333	0.03077	GULP1	GULP, engulfment adaptor PTB domain containing 1		208289	-5.24993	0.0299813	CA12	carbonic anhydrase XII
102862	8.68836	0.0225938	TEX9	testis expressed sequence 9		120923	-5.1586	0.00536527	AQP9	aquaporin 9
159423	7.72098	0.0353836	RBM35A	RNA binding motif protein 35A		115055	-5.11049	0.0296591	C2orf26	chromosome 2 open reading frame 26
169469	7.72027	0.0139111	SLC1A1	solute carrier family 1 (neuronal/epithelial high affinity glutamate transporter, system Xag), member 1		143113	-5.0652	0.01906	SYK	spleen tyrosine kinase
146019	7.5122	0.0466638	PAM	peptidylglycine alpha-amidating monooxygenase		103252	-5.01996	0.0377147
102013	7.40954	0.0149645	ST8SIA1	ST8 alpha-N-acetyl-neuraminide alpha-2,8-sialyltransferase 1		112640	-4.95823	0.0169004	MMP9	matrix metallopeptidase 9 (gelatinase B, 92kDa gelatinase, 92kDa type IV collagenase)
108284	7.01889	0.0453858	CXADR	coxsackie virus and adenovirus receptor		124416	-4.90327	0.0172728	FBN2	fibrillin 2 (congenital contractural arachnodactyly)
142470	6.98433	0.030492	NGEF	neuronal guanine nucleotide exchange factor		171675	-4.76331	0.00446161
211103	6.97653	0.00517078	C14orf37	chromosome 14 open reading frame 37		151446	-4.64421	0.00755838	FLJ42709
182179	6.89929	0.0190486	EFS	embryonal Fyn-associated substrate		703401	-4.5327	0.0446881	UNQ6975
183771	6.58698	0.00159787	FOXF1	forkhead box F1		186009	-4.46374	0.0352713	IL1R2	interleukin 1 receptor, type II
106266	5.60532	0.0251246	RNF182	ring finger protein 182		197520	-4.30411	0.00674082	GPR109A	G protein-coupled receptor 109A
201072	5.40485	0.0365549	SNAP25	synaptosomal-associated protein, 25kDa		189998	-4.25594	0.0260273
107957	5.39377	0.0277626	DKFZP586A0522			117823	-4.18666	0.0184309	RNF165	ring finger protein 165
126360	5.39253	0.0257778	CPE	carboxypeptidase E		122775	-4.14792	0.0192565	2010-09-06	septin 6
126761	5.06879	0.047054	VWF	von Willebrand factor		185343	-4.12674	0.0362996	C20orf46	chromosome 20 open reading frame 46
192031	4.64175	0.0358515	LOC401384			148166	-4.09611	0.0133352	CDCA2	cell division cycle associated 2
188631	4.46268	0.00154827	RASGRP1	RAS guanyl releasing protein 1 (calcium and DAG-regulated)		204650	-4.06645	0.0447453	HS3ST2	heparan sulfate (glucosamine) 3-O-sulfotransferase 2
197651	4.4254	0.011618	ID4	inhibitor of DNA binding 4, dominant negative helix-loop-helix protein		540912	-4.05803	0.0433913	STK6P	serine/threonine kinase 6 pseudogene
123063	4.29938	0.0437849	ZMAT1	zinc finger, matrin type 1		234297	-3.86746	0.923654
117918	4.25859	0.0465224	ITM2C	integral membrane protein 2C		114219	-3.72785	0.923654	PSG6	pregnancy specific beta-1-glycoprotein 6
166519	4.19723	0.0347202	CKMT1B|CKMT1A	creatine kinase, mitochondrial 1B|creatine kinase, mitochondrial 1A		170215	-3.62277	0.923654	NRG2	neuregulin 2
708958	4.04575	0.00562515	NFE2L3	nuclear factor (erythroid-derived 2)-like 3		221217	-3.61348	0.923654	SORCS3	sortilin-related VPS10 domain containing receptor 3
114557	4.00549	0.00828889	PCDHB12	protocadherin beta 12		204151	-3.59198	0.923654	HK2	hexokinase 2
198262	3.99185	0.0253131	ICA1	islet cell autoantigen 1, 69kDa		223404	-3.57454	0.923654
123139	3.97699	0.0426687	SYNE1	spectrin repeat containing, nuclear envelope 1		175347	-3.50121	0.923654	LOC440450
149253	3.96076	0.00467365	PAMCI	peptidylglycine alpha-amidating monooxygenase COOH-terminal interactor		164803	-3.41614	0.923654	MGC11266
671910	3.86331	0.0468845	OLFML1	olfactomedin-like 1		229029	-3.36197	0.923654
130009	3.80311	0.0219983	PKD2	polycystic kidney disease 2 (autosomal dominant)		144569	-3.34557	0.923654	MT1F	metallothionein 1F (functional)
106427	3.67977	0.0107891	CGNL1	cingulin-like 1		152791	-3.31946	0.923654	C14orf1	chromosome 14 open reading frame 1
139755	3.63034	0.0107342	KCTD1	potassium channel tetramerisation domain containing 1		162571	-3.31532	0.923654	PCSK5	proprotein convertase subtilisin/kexin type 5
171706	3.59903	0.0165315	DKFZp434K2435			182651	-3.30073	0.923654	FIGN	fidgetin
173244	3.5791	0.0291186	CRHR1	corticotropin releasing hormone receptor 1		235259	-3.26633	0.923654	PROCA1
182938	3.57662	0.0300109	C6orf85	chromosome 6 open reading frame 85		183248	-3.24962	0.923654	ZNF238	zinc finger protein 238
214773	3.56771	0.0490975	MAOB	monoamine oxidase B		185969	-3.23446	0.923654	NEBL	nebulette
124430	3.56084	0.00654641	TAF2	TAF2 RNA polymerase II, TATA box binding protein (TBP)-associated factor, 150kDa		228605	-3.21924	0.923654
114839	3.5453	0.0127922	PLA2G4B	phospholipase A2, group IVB (cytosolic)		141333	-3.20793	0.923654	CHI3L1	chitinase 3-like 1 (cartilage glycoprotein-39)
111560	3.52928	0.00370611	TANC2	tetratricopeptide repeat, ankyrin repeat and coiled-coil containing 2		234587	-3.1693	0.923654	LOC219690
106775	3.47936	0.0333548	FBXO15	F-box protein 15		136474	-3.14371	0.923654	UNC5CL	unc-5 homolog C (C. elegans)-like
177086	3.46949	0.0378888	TSPYL2	TSPY-like 2		173294	-3.13986	0.923654	ANKRD37	ankyrin repeat domain 37
184792	3.30017	0.0270377				147967	-3.13903	0.923654	PIK3C2G	phosphoinositide-3-kinase, class 2, gamma polypeptide
145553	3.27785	0.0456303	CBR3	carbonyl reductase 3		225155	-3.09506	0.923654
174214	3.27011	0.0218661	HIGD1B	HIG1 domain family, member 1B		144399	-3.08623	0.923654	HRASLS3	HRAS-like suppressor 3
193798	3.26558	0.00665997	IQGAP1	IQ motif containing GTPase activating protein 1		142235	-3.07528	0.923654	ENO2	enolase 2 (gamma, neuronal)
167324	3.17805	0.0111244	ACRC	acidic repeat containing		568541	-3.07318	0.923654	NY-REN-7|LOC389347
198650	3.16696	0.0469899	COLEC11	collectin sub-family member 11		191463	-3.04078	0.923654	TPCN2	two pore segment channel 2
542149	3.16019	0.0421608	LOC441264|LOC442595			226343	-3.03326	0.923654
108301	3.14807	0.00882232	PDGFD	platelet derived growth factor D		225051	-2.99216	0.923654
215435	3.12963	0.0305238	PLEKHG1	pleckstrin homology domain containing, family G (with RhoGef domain) member 1		234317	-2.9838	0.923654
190997	3.12745	0.0287618	CGRRF1	cell growth regulator with ring finger domain 1		178008	-2.97517	0.923654	FAM11A	family with sequence similarity 11, member A
162554	3.12506	0.0268058	FLJ13273			103970	-2.92491	0.923654	FAM73B	family with sequence similarity 73, member B
184006	3.05395	0.0170754	KLHL3	kelch-like 3 (Drosophila)		190410	-2.88531	0.923654	GAS8	growth arrest-specific 8
174451	3.02456	0.0354741	CEP135	centrosomal protein 135kDa		182089	-2.88251	0.923654	TJP3	tight junction protein 3 (zona occludens 3)
133435	3.00125	0.0165558	KIAA0574			155169	-2.87198	0.923654	SPDEF	SAM pointed domain containing ets transcription factor
173179	2.99758	0.0214655	LY6H	lymphocyte antigen 6 complex, locus H		206427	-2.84088	0.923654	GYS1	glycogen synthase 1 (muscle)
217468	2.9849	0.0446654	VprBP			178676	-2.83874	0.923654
163534	2.96668	0.047966	COMMD3	COMM domain containing 3		228081	-2.81858	0.923654	PAN3
164404	2.96229	0.0336122	MCTP2	multiple C2 domains, transmembrane 2		236491	-2.81172	0.923654
109699	2.95618	0.0050423	KYNU	kynureninase (L-kynurenine hydrolase)		147818	-2.78768	0.923654	TMEM80	transmembrane protein 80
130435	2.92851	0.0265582	DYRK2	dual-specificity tyrosine-(Y)-phosphorylation regulated kinase 2		407885	-2.78453	0.923654	LCE4A	late cornified envelope 4A
233483	2.904	0.0105511				180868	-2.74989	0.923654
168731	2.88489	0.0261542	ZNF26	zinc finger protein 26 (KOX 20)		236487	-2.74721	0.923654
173430	2.88476	0.0468588	C1orf71	chromosome 1 open reading frame 71		128405	-2.74393	0.923654	LOC441019
615986	2.87007	0.0323295				223159	-2.73918	0.923654	TSGA10IP	testis specific, 10 interacting protein
132931	2.84662	0.0110154	PDZK8	PDZ domain containing 8		203785	-2.73875	0.923654	BHLHB5	basic helix-loop-helix domain containing, class B, 5
177286	2.8166	0.00864705	SCN7A	sodium channel, voltage-gated, type VII, alpha		166684	-2.7381	0.923654	NIBP
711271	2.81419	0.0105457	KRTAP6-3	keratin associated protein 6-3		217646	-2.7326	0.923654	C14orf145	chromosome 14 open reading frame 145
228228	2.78328	0.0375574				212373	-2.7311	0.923654	MT1L	metallothionein 1L
496276	2.69757	0.00337731	FLJ33360			113042	-2.70255	0.923654	FGF2	fibroblast growth factor 2 (basic)
173910	2.69598	0.0451298	SUHW4	suppressor of hairy wing homolog 4 (Drosophila)		235333	-2.69732	0.923654
218092	2.6693	0.0477749				106466	-2.68763	0.923654	DRG2	developmentally regulated GTP binding protein 2
592455	2.65249	0.00926974				149528	-2.6857	0.923654	LOC402207|LOC402208|LOC402203|LOC391761|LOC402205|LOC391747|LOC402199|LOC402211|LOC402210|LOC285563|LOC391763|LOC402204|LOC391749|LOC402202|LOC391746|LOC402206|LOC402201|LOC402200|LOC202201|LOC402209
694289	2.63633	0.0331014				188608	-2.67799	0.923654	SLC25A10	solute carrier family 25 (mitochondrial carrier; dicarboxylate transporter), member 10
176144	2.6332	0.039044	LOC256021			105885	-2.67146	0.923654	SFRS16	splicing factor, arginine/serine-rich 16 (suppressor-of-white-apricot homolog, Drosophila)
150983	2.62942	0.00823896	HLA-G	HLA-G histocompatibility antigen, class I, G		231854	-2.67077	0.923654	C10orf71	chromosome 10 open reading frame 71
133261	2.62278	0.0381258	RFX5	regulatory factor X, 5 (influences HLA class II expression)		228286	-2.66391	0.923654
126951	2.61082	0.032327	DSG3	desmoglein 3 (pemphigus vulgaris antigen)		224505	-2.64082	0.923654
206283	2.58214	0.0207004				216415	-2.63636	0.923654
189275	2.57955	0.02151	KIAA0494	KIAA0494		594725	-2.62365	0.923654
205626	2.56554	0.0353903	GLB1L	galactosidase, beta 1-like		202776	-2.61077	0.923654	DCAMKL1	doublecortin and CaM kinase-like 1
109841	2.55562	0.003131	SDFR1	stromal cell derived factor receptor 1		128305	-2.60918	0.923654	PFKP	phosphofructokinase, platelet
209725	2.55285	0.0292333	SLC30A5	solute carrier family 30 (zinc transporter), member 5		177864	-2.60482	0.923654	FAM14A	family with sequence similarity 14, member A
203555	2.54876	0.0131281	LOC127602			449953	-2.60358	0.923654	LCE1D	late cornified envelope 1D
127917	2.53888	0.0363454	NCALD	neurocalcin delta		217299	-2.59816	0.923654
183976	2.48344	0.0376488	EME1	essential meiotic endonuclease 1 homolog 1 (S. pombe)		189160	-2.59396	0.923654	CPOX	coproporphyrinogen oxidase
226230	2.4558	0.0181595				236939	-2.58915	0.923654
218418	2.45174	0.0152782				219662	-2.58338	0.923654	KIAA1713	KIAA1713
169650	2.44239	0.0258342	SLC15A1	solute carrier family 15 (oligopeptide transporter), member 1		193609	-2.56268	0.923654
212421	2.43117	0.00431789	ZNF20	zinc finger protein 20 (KOX 13)		108749	-2.55144	0.923654	ING5	inhibitor of growth family, member 5
171071	2.41788	0.0162733	CCDC41	coiled-coil domain containing 41		195331	-2.53403	0.923654
162796	2.41659	0.0401103	C22orf3	chromosome 22 open reading frame 3		232536	-2.52843	0.923654	LOC550112
221994	2.38153	0.0298357	CDC14B	CDC14 cell division cycle 14 homolog B (S. cerevisiae)		161087	-2.51789	0.923654	LOC392549
137294	2.36888	0.0126411	VANGL1	vang-like 1 (van gogh, Drosophila)		220107	-2.51716	0.923654	SEPX1	selenoprotein X, 1
120229	2.36267	0.0180137	CIB1	calcium and integrin binding 1 (calmyrin)		235434	-2.49896	0.923654
105275	2.34813	0.0184527	FLJ44606			230418	-2.48873	0.923654
186758	2.34612	0.0313861	LOC196394			109978	-2.47528	0.923654
137923	2.32832	0.0101027	LASS2	LAG1 longevity assurance homolog 2 (S. cerevisiae)		157759	-2.47343	0.923654	FAM80A	family with sequence similarity 80, member A
102133	2.32214	0.0357365	C3orf9	chromosome 3 open reading frame 9		219085	-2.47041	0.923654	FLJ13639
175688	2.31802	0.018558	HYI	hydroxypyruvate isomerase homolog (E. coli)		274327	-2.46552	0.923654
171175	2.31665	0.0123315	LOC441038			184897	-2.46298	0.923654	SFXN2	sideroflexin 2
146772	2.31242	0.0065828	ENPP2	ectonucleotide pyrophosphatase/phosphodiesterase 2 (autotaxin)		162989	-2.45606	0.923654	CCL28	chemokine (C-C motif) ligand 28
202921	2.31188	0.040571	IFT74	intraflagellar transport 74 homolog (Chlamydomonas)		101034	-2.44704	0.923654	SCIN	scinderin
162611	2.30951	0.0327787	CD59	CD59 antigen p18-20 (antigen identified by monoclonal antibodies 16.3A5, EJ16, EJ30, EL32 and G344)		142084	-2.44124	0.923654	LOC440722
126050	2.30792	0.0140939				223544	-2.42627	0.923654
10558922	2.28661	0.00883222	LOC157627			236913	-2.42463	0.923654
119391	2.27779	0.036198				209011	-2.42132	0.923654
205558	2.26741	0.0172509				210420	-2.39107	0.923654	STX1A	syntaxin 1A (brain)
134551	2.26579	0.0312868	SERPINI1	serpin peptidase inhibitor, clade I (neuroserpin), member 1		162795	-2.38998	0.923654
131604	2.2644	0.0139427	LARP2	La ribonucleoprotein domain family, member 2		161015	-2.38865	0.923654	PDCD1	programmed cell death 1
209110	2.25896	0.00801196	RP3-462O23.2			153215	-2.38495	0.923654	LRRC29	leucine rich repeat containing 29
110609	2.25707	0.0489259	CYBB	cytochrome b-245, beta polypeptide (chronic granulomatous disease)		108511	-2.37258	0.923654	GCDH	glutaryl-Coenzyme A dehydrogenase
209244	2.25179	0.0344465	C1orf166	chromosome 1 open reading frame 166		236226	-2.37169	0.923654
162637	2.2498	0.0374035	FTS	fused toes homolog (mouse)		111164	-2.37097	0.923654	C9orf90	chromosome 9 open reading frame 90
211100	2.23878	0.0290964	CAT	catalase		127042	-2.34299	0.923654	FAM22E|FAM22A|FAM22B|FAM22C|FAM22F|FAM22D	family with sequence similarity 22, member E|family with sequence similarity 22, member A|family with sequence similarity 22, member B|family with sequence similarity 22, member C|family with sequence similarity 22, member F|family with sequence similarity 22, member D
220463	2.23666	0.0299693				236668	-2.32772	0.923654
227194	2.23175	0.0329732	UTRN	utrophin (homologous to dystrophin)		178783	-2.31823	0.923654	FLJ20105
120648	2.22983	0.0440032	PDZK6	PDZ domain containing 6		206451	-2.317	0.923654
188439	2.22666	0.0214699	LIMD1	LIM domains containing 1		215797	-2.31197	0.923654
133345	2.22658	0.0132234	SLC39A7	solute carrier family 39 (zinc transporter), member 7		187113	-2.27494	0.923654
207097	2.22178	0.0289016				196826	-2.259	0.923654	HGFAC	HGF activator
160108	2.21499	0.0385298				236621	-2.24992	0.923654
106764	2.21023	0.0305874	FAM102B	family with sequence similarity 102, member B		215824	-2.24957	0.923654	MRPL2	mitochondrial ribosomal protein L2
152384	2.20712	0.039801	ADAMTSL4	ADAMTS-like 4		142008	-2.21174	0.923654
115885	2.19191	0.0136473	LOC389396			206424	-2.21003	0.923654	ELK4	ELK4, ETS-domain protein (SRF accessory protein 1)
150893	2.18859	0.0204152	SNX16	sorting nexin 16		165395	-2.20391	0.923654	SCNN1D	sodium channel, nonvoltage-gated 1, delta
170734	2.1873	0.0346433	NQO2	NAD(P)H dehydrogenase, quinone 2		133511	-2.20168	0.923654	CEBPE	CCAAT/enhancer binding protein (C/EBP), epsilon
190782	2.18362	0.0339744	HLA-DMA	major histocompatibility complex, class II, DM alpha		174855	-2.1943	0.923654	LOC441837
167637	2.1751	0.0490443	PCGF4	polycomb group ring finger 4		162236	-2.19147	0.923654	HSPB2	heat shock 27kDa protein 2
131228	2.16104	0.0299218				229447	-2.18935	0.923654	LOC344178
158366	2.15942	0.0379567	VEZATIN			200734	-2.18618	0.923654	SAAL1	serum amyloid A-like 1
139192	2.15566	0.0389672	CMKOR1	chemokine orphan receptor 1		194416	-2.1827	0.923654	RNPEPL1	arginyl aminopeptidase (aminopeptidase B)-like 1
235532	2.14375	0.0449455	HS2ST1	heparan sulfate 2-O-sulfotransferase 1		216111	-2.17993	0.923654
191337	2.13819	0.0474409	CNIH3	cornichon homolog 3 (Drosophila)		157355	-2.17966	0.923654	LOC441630
155213	2.13635	0.00478087	CNN2	calponin 2		231173	-2.16471	0.923654
126602	2.13434	0.0278869	RABGAP1L	RAB GTPase activating protein 1-like		155110	-2.15937	0.923654	MGC9712
170961	2.12544	0.0320736	HBS1L	HBS1-like (S. cerevisiae)		209529	-2.12968	0.923654	CYBASC3	cytochrome b, ascorbate dependent 3
207419	2.11463	0.00791682	OXSM	3-oxoacyl-ACP synthase, mitochondrial		231824	-2.12938	0.923654	LOC346085
101603	2.11319	0.0136709	TMEM57	transmembrane protein 57		236217	-2.11307	0.923654
175766	2.11107	0.02709	RWDD4A	RWD domain containing 4A		154938	-2.10761	0.923654	MGC52057
115526	2.10109	0.0471854	THRA	thyroid hormone receptor, alpha (erythroblastic leukemia viral (v-erb-a) oncogene homolog, avian)		224730	-2.07256	0.923654	FLJ39647
617943	2.09808	0.0303066	DKFZp434O0527			165632	-2.06199	0.923654	PPARD	peroxisome proliferative activated receptor, delta
105903	2.08971	0.0208027	RNUT1	RNA, U transporter 1		115725	-2.06098	0.923654	ANKRD38	ankyrin repeat domain 38
210314	2.07754	0.022426	TBC1D4	TBC1 domain family, member 4		193094	-2.0514	0.923654	CNR2	cannabinoid receptor 2 (macrophage)
205746	2.07561	0.014174	TMEM87A	transmembrane protein 87A		205133	-2.05046	0.923654
198852	2.07385	0.0333847	ATP7B	ATPase, Cu++ transporting, beta polypeptide		208026	-2.04757	0.923654	GUCY1A2	guanylate cyclase 1, soluble, alpha 2
102559	2.05232	0.0473115	PSME4	proteasome (prosome, macropain) activator subunit 4		235868	-2.03671	0.923654	GAPDH	glyceraldehyde-3-phosphate dehydrogenase
224647	2.04744	0.0437385	DNAJC19	DnaJ (Hsp40) homolog, subfamily C, member 19		122858	-2.03363	0.923654	AGPS	alkylglycerone phosphate synthase
198198	2.03255	0.0497172	LPGAT1	lysophosphatidylglycerol acyltransferase 1		234257	-2.02841	0.923654	PRAMEF11	PRAME family member 11
203381	2.00538	0.0119166	FOXP1	forkhead box P1		212759	-2.01991	0.923654	GPI	glucose phosphate isomerase
182662	2.005	0.0158093	RP11-535K18.3			233145	-2.01786	0.923654	C14orf43	chromosome 14 open reading frame 43
107835	2.0016	0.0482541	FUCA1	fucosidase, alpha-L- 1, tissue		155603	-2.01532	0.923654
						700976	-2.00782	0.923654

## Sheet: Cohort 2 Funct Analysis
Upregulated Cohort 2 Genes
Biological Process	Count	P-Value	Benjamini		Molecular Function	Count	P-Value	Benjamini		Pathway (Kegg)	Count	P-Value	Benjamini
Muscle cell differentiation	5	0.0049	0.99		Metal ion transmembrane transporter activity	7	0.012	0.98		Type I diabetes mellitus	4	0.0024	0.14
Regulation of small GTPase mediated signal transduction	6	0.014	1		Cation transmembrane transporter activity	9	0.016	0.91		Tryptophan metabolism	3	0.027	0.58
Cellular zinc ion homeostasis	2	0.039	1		Cation binding	35	0.016	0.8		Viral myocarditis	3	0.077	0.81
Zinc ion homeostasis	2	0.044	1		Calcium ion binding	12	0.017	0.74
Parturition	2	0.061	1		Ion binding	35	0.02	0.71
Transition metal ion transport	3	0.061	1		Metal ion binding	34	0.024	0.71
Striated muscle cell differentiation	3	0.089	1		Ion transmembrane transporter activity	10	0.025	0.67
Response to zinc ion	2	0.092	1		Voltage-gated channel activity	5	0.027	0.65
					Voltage-gated ion channel activity	5	0.027	0.65
					Substrate-specific transmembrane transporter activity	10	0.051	0.83
Downregulated Cohort 2 Genes
Biological Process	Count	P-Value	Benjamini		Molecular Function	Count	P-Value	Benjamini		Pathway (Kegg)	Count	P-Value	Benjamini
Glucose metabolic process	8	4.6e-06	0.0039		Cadmium ion binding	3	0.0007	0.16		Glycolysis / Gluconeogenesis	5	0.00022	0.01
Hexose metabolic process	8	2e-05	0.0086		Monosaccharide binding	3	0.011	0.75		Starch and sucrose metabolism	3	0.019	0.36
Monosaccharide metabolic process	8	5.1e-05	0.014		Binding	58	0.013	0.67
Glycolysis	5	5.2e-05	0.011		Glucose binding	2	0.028	0.82
Carbohydrate catabolic process	6	0.00011	0.019		Copper ion binding	3	0.032	0.79
Glucose catabolic process	5	0.00012	0.017		Sugar binding	4	0.044	0.84
Hexose catabolic process	5	0.00024	0.028		Carbohydrate binding	5	0.054	0.86
Monosaccharide catabolic process	5	0.00026	0.028		Cation binding	24	0.055	0.82
Generation of precursor metabolites and energy	8	0.00043	0.04		Ion binding	24	0.064	0.83
Alcohol catabolic process	5	0.00044	0.037		Carbohydrate kinase activity	2	0.078	0.86
Unaltered Cohort 2 Genes
Biological Process	Count	P-Value	Benjamini		Molecular Function	Count	P-Value	Benjamini		Pathway (Kegg)	Count	P-Value	Benjamini
Intracellular protein transport	11	0.00089	0.61		Protein binding	84	0.0029	0.6		Oxidative phosphorylation	5	0.025	0.81
Translational elongation	6	0.0013	0.5		RNA binding	14	0.0064	0.64		Parkinson's disease	4	0.098	0.97
Cellular protein localization	11	0.0018	0.47		Translation elongation factor activity	3	0.017	0.83
Cellular macromolecule localization	11	0.0019	0.39		Oxidoreductase activity, acting on NADH or NADPH, quinone or similar compound as acceptor	3	0.062	0.99
Intracellular transport	14	0.0025	0.4		Protein disulfide isomerase activity	2	0.072	0.99
Cellular protein metabolic process	32	0.0031	0.42		Intramolecular oxidoreductase activity, transposing S-S bonds	2	0.072	0.99
Cellular macromolecule metabolic process	57	0.005	0.53		Intramolecular oxidoreductase activity, interconverting keto- and enol-groups	2	0.08	0.99
Cellular process	98	0.005	0.48		Insulin receptor substrate binding	2	0.087	0.98
Macromolecule metabolic process	61	0.0055	0.47
Signal complex assembly	3	0.0072	0.53
