# Supplementary material for: Suppression of cancer stemness p21-regulating mRNA and microRNA signatures in recurrent ovarian cancer patient samples
Source: J Ovarian Res. 2012 Jan 19;5:2. doi: 10.1186/1757-2215-5-2 (PMC3285047; doi:10.1186/1757-2215-5-2)
Supplement: Additional file 5 — Comparison of microRNA expression in hEC and primary versus recurrent tumor samples. This file details the relative expression patterns and levels of microRNAs in hEC cells and primary versus recurrent tumor samples and the pathway associations of genes targeted by these microRNAs. [file 1757-2215-5-2-S5.XLS]

## Sheet: miR Expression
U=Undifferentiated: D=Differentiated: P=Primary tumour: R=Recurrent tumour: Down=Downregulated: Up=Upregulated: NC=No Change: Undet= Undectected
Upregulated (P/R)						Downregulated (P/R)
	% miRNA Expression						% miRNA Expression
miRNA	R/P	2102Ep (U) vs NTera2 (U)	NTera2 D/U)	2102Ep (D/U)		miRNA	R/P	2102Ep (U) vs NTera2 (U)	NTera2 D/U)	2102Ep (D/U)
miR-223	1135.57	NC	Up	NC		miR-9	388.646	1055	Up	NC
miR-206	1009.24	-220	NC	NC		miR-137	297.4	NC	Down	Up
miR-30a3p	816.742	NC	Up	NC		miR-100	231.806	-230	NC	NC
miR-368	815.286	3500	NC	NC		miR-99a	229.789	43600	Up	Up
miR-10b	772.713	NC	Undet	NC		miR-31	229.021	1100	NC	Down
miR-338	770.427	41500	Up	Down		miR-125b	214.217	120	NC	NC
miR-195	716.678	NC	A	A		miR-30d	213.984	150	NC	NC
miR-93	584.948	-160	Down	NC		miR-326	201.809	190	NC	NC
miR-23a	551.431	200	NC	NC
miR-185	526.57	120	NC	NC
miR-22	514.929	290	Up	NC
miR-339	492.521	28100	Up	NC
miR-186	447.989	-140	NC	NC
miR-128a	442.676	-150	NC	NC
miR-374	436.903	-100	NC	NC
miR-193	400.21	1100	NC	NC
miR-106b	397.19	-160	NC	NC
miR-194	384.051	-100	NC	NC
miR-224	344.7	NC	Undet	NC
miR-222	342.953	110	NC	NC
miR-29c	336.303	140	NC	NC
miR-21	333.114	200	NC	NC
miR-34c	315.829	35320	Up	Down
miR-139	314.175	-740	Down	NC
miR-197	293.765	10640	NC	NC
miR-15a	292.899	17030	Up	Down
miR-218	288.362	940	Up	NC
miR-106a	281.51	20780	NC	NC
miR-340	280.769	49250	Up	NC
miR-219	279.736	210	Up	NC
miR-155	271.043	NC	Undet	Down
miR-92	270.106	5490	Up	NC
let7g	260.671	46460	NC	Down
miR-328	260.141	8730	Up	NC
miR-149	244.19	-15560	Up	NC
miR-23b	242.727	120	NC	NC
miR-221	238.928	38500	Up	NC
miR-150	228.417	-180	NC	NC
miR-190	214.926	-250	NC	NC
miR-107	210.618	110	NC	NC
miR-331	209.149	7350	Up	NC
miR-181c	207.206	130	NC	NC
miR-133b	202.573	25860	Up	NC

## Sheet: Pathway Analysis (Up)
Let-7g				miR-106a				miR-106b				miR-107				miR-10b				miR-128a
KEGG Pathway	Number of Genes	p-value		KEGG Pathway	Number of Genes	p-value		KEGG Pathway	Number of Genes	p-value		KEGG Pathway	Number of Genes	p-value		KEGG Pathway	Number of Genes	p-value		KEGG Pathway	Number of Genes	p-value
MAPK signaling pathway	27	6.8764e-07		MAPK signaling pathway	28	0.000118571		MAPK signaling pathway	29	5.84456e-06		Focal adhesion	25	1.00553e-06		Axon guidance	5	0.00687406		MAPK signaling pathway	24	0.0120342
Focal adhesion	19	0.000261259		Focal adhesion	20	0.00470091		Focal adhesion	20	0.00162866		MAPK signaling pathway	21	0.0244775		Wnt signaling pathway	5	0.0212797		Focal adhesion	20	0.00814786
Calcium signaling pathway	16	0.00129402		Regulation of actin cytoskeleton	19	0.0301974		TGF-beta signaling pathway	17	2.34124e-08		Regulation of actin cytoskeleton	19	0.0109985		Focal adhesion	5	0.0963276		Insulin signaling pathway	16	0.00609675
ECM-receptor interaction	11	0.000161662		Wnt signaling pathway	18	0.000623601		Axon guidance	16	0.000231716		Insulin signaling pathway	18	5.38128e-05		Renal cell carcinoma	4	0.00189223		TGF-beta signaling pathway	14	0.000203468
Melanoma	10	0.00030659		Axon guidance	17	0.000153778		Ubiquitin mediated proteolysis	16	0.00052611		Wnt signaling pathway	17	0.000636198		ErbB signaling pathway	4	0.0105672		GnRH signaling pathway	14	0.000495472
Chronic myeloid leukemia	10	0.000649051		Ubiquitin mediated proteolysis	16	0.00150344		Wnt signaling pathway	16	0.00293808		Prostate cancer	15	2.06579e-06		Cell adhesion molecules (CAMs)	4	0.0692522		Colorectal cancer	11	0.0116786
TGF-beta signaling pathway	10	0.0043831		Insulin signaling pathway	16	0.00366107		Pancreatic cancer	13	6.33133e-06		Melanoma	14	2.38237e-07		Long-term potentiation	3	0.0327124		Renal cell carcinoma	9	0.0235177
p53 signaling pathway	9	0.00124328		Chronic myeloid leukemia	15	4.08816e-07		Prostate cancer	13	0.000193545		Colorectal cancer	13	8.61001e-05		Glioma	3	0.0350844		Pancreatic cancer	9	0.0376283
Pancreatic cancer	9	0.00282287		Prostate cancer	14	8.78394e-05		Cell cycle	13	0.00524752		Axon guidance	13	0.0121552		Chronic myeloid leukemia	3	0.07502		Chronic myeloid leukemia	9	0.0513033
Colorectal cancer	9	0.0131675		Glioma	13	1.51514e-06		Insulin signaling pathway	13	0.0424257		Acute myeloid leukemia	12	2.38237e-07		Glycosphingolipid biosynthesis - globoseries	2	0.000800719		mTOR signaling pathway	7	0.0237541
Glioma	8	0.00470091		TGF-beta signaling pathway	13	0.000642592		Renal cell carcinoma	12	2.41796e-05		Pancreatic cancer	12	5.22223e-05		Ether lipid metabolism	2	0.0539337		N-Glycan biosynthesis	6	0.045502
Bladder cancer	7	0.000623601		Cell cycle	13	0.0113334		Chronic myeloid leukemia	12	0.000129737		Cell cycle	12	0.0157644
Adherens junction	7	0.0596059		Pancreatic cancer	12	0.000193545		ErbB signaling pathway	12	0.000997758		Ubiquitin mediated proteolysis	12	0.0550232
Type II diabetes mellitus	6	0.00396599		ErbB signaling pathway	12	0.00238156		Colorectal cancer	11	0.00377257		Non-small cell lung cancer	11	3.50963e-06
Amyotrophic lateral sclerosis (ALS)	4	0.00358858		Bladder cancer	11	8.5907e-08		Small cell lung cancer	11	0.00377257		Glioma	11	5.65718e-05
				Melanoma	11	0.0010701		Bladder cancer	10	7.44912e-07		Renal cell carcinoma	11	0.000189713
				Small cell lung cancer	11	0.00790705		Glioma	10	0.000642592		Long-term depression	11	0.000531398
				Renal cell carcinoma	10	0.00362464		Melanoma	9	0.0139818		Chronic myeloid leukemia	11	0.000769323
				Non-small cell lung cancer	9	0.00164502		mTOR signaling pathway	8	0.00133343		Small cell lung cancer	11	0.00321477
				Adipocytokine signaling pathway	9	0.0194482		Non-small cell lung cancer	8	0.00568457		Melanogenesis	11	0.0151463
				mTOR signaling pathway	8	0.00271219		Long-term potentiation	8	0.0192547		VEGF signaling pathway	10	0.00171216
				Long-term potentiation	8	0.0323869		p53 signaling pathway	8	0.035437		Adherens junction	10	0.00238156
				Circadian rhythm	4	0.00110269		Adipocytokine signaling pathway	8	0.0437178		ErbB signaling pathway	10	0.0175975
				Amyotrophic lateral sclerosis (ALS)	4	0.0183156		Neurodegenerative Diseases	6	0.0132999		Gap junction	10	0.0317456
								Circadian rhythm	4	0.000605171		mTOR signaling pathway	9	9.42085e-05
								Prion disease	3	0.0275983		Endometrial cancer	9	0.000385874
												p53 signaling pathway	9	0.00708341
												Bladder cancer	8	0.000291637
												Long-term potentiation	8	0.017249
												Basal cell carcinoma	7	0.024234
												Hedgehog signaling pathway	7	0.0278757
												SNARE interactions in vesicular transport	6	0.00782838
												Thyroid cancer	5	0.0113334
												Circadian rhythm	4	0.000531398
												Polyunsaturated fatty acid biosynthesis	4	0.0208584
												D-Glutamine and D-glutamate metabolism	2	0.00425356
												Fatty acid biosynthesis	2	0.0323869

## Sheet: Pathway Analysis (Down)
miR-100				miR-125				miR-137				miR-30d				miR-31				miR-326				miR-9					miR-99a
KEGG Pathway	Number of Genes	p-value		KEGG Pathway	Number of Genes	p-value		KEGG Pathway	Number of Genes	p-value		KEGG Pathway	Number of Genes	p-value		KEGG Pathway	Number of Genes	p-value		KEGG Pathway	Number of Genes	p-value		KEGG Pathway	Number of Genes	p-value		KEGG Pathway	Number of Genes	p-value
Colorectal cancer	3	1.8692e-06		MAPK signaling pathway	15	0.0295994		MAPK signaling pathway	23	0.00153381		Regulation of actin cytoskeleton	25	0.000263884		Ubiquitin mediated proteolysis	7	0.00174675		Focal adhesion	9	0.0159229		MAPK signaling pathway	28	0.00121866		Colorectal cancer	3	1.8692e-06
Melanogenesis	3	1.22498e-05		Ubiquitin mediated proteolysis	9	0.045502		Axon guidance	19	1.17128e-07		Ubiquitin mediated proteolysis	22	3.08977e-07		Wnt signaling pathway	7	0.00514361		Regulation of actin cytoskeleton	9	0.0293049		Regulation of actin cytoskeleton	23	0.00421123		Melanogenesis	3	1.22498e-05
Wnt signaling pathway	3	0.000564257		ErbB signaling pathway	7	0.0395575		Ubiquitin mediated proteolysis	14	0.00293808		Axon guidance	20	3.87874e-06		T cell receptor signaling pathway	6	0.000642592		Wnt signaling pathway	7	0.035437		Focal adhesion	21	0.0086517		Wnt signaling pathway	3	0.000564257
Heparan sulfate biosynthesis	2	2.21633e-10		Selenoamino acid metabolism	4	0.0149956		Wnt signaling pathway	13	0.0333733		Calcium signaling pathway	17	0.0270518		Axon guidance	6	0.0107807		Long-term potentiation	6	0.000187825		Glycan structures - biosynthesis 1	15	0.00708341		Heparan sulfate biosynthesis	2	2.21633e-10
Basal cell carcinoma	2	0.000359786		Parkinson's disease	3	0.0287246		ErbB signaling pathway	11	0.00202943		Glycan structures - biosynthesis 1	15	0.00451658		GnRH signaling pathway	5	0.0149956		Melanogenesis	6	0.0134335		Ubiquitin mediated proteolysis	15	0.0188734		Basal cell carcinoma	2	0.000359786
Long-term potentiation	2	0.00119453		Glycosphingolipid biosynthesis - neo-lactoseries	3	0.0365162		VEGF signaling pathway	9	0.00509243		ErbB signaling pathway	13	0.00125578		Huntington's disease	4	1.03347e-05		Phosphatidylinositol signaling system	5	0.011109		Adherens junction	13	0.000112788		Long-term potentiation	2	0.00119453
Glioma	2	0.00133343		Neuroactive ligand-receptor interaction	2	0.0290133		Adherens junction	9	0.00680566		T cell receptor signaling pathway	12	0.0072265		B cell receptor signaling pathway	4	0.0095616		Adherens junction	5	0.0122773		Colorectal cancer	12	0.00634556		Glioma	2	0.00133343
Prostate cancer	2	0.00927901						T cell receptor signaling pathway	9	0.0437178		Long-term potentiation	11	0.000435072		Amyotrophic lateral sclerosis (ALS)	2	0.0327124		ECM-receptor interaction	5	0.024972		ErbB signaling pathway	12	0.00822975		Prostate cancer	2	0.00927901
Glycan structures - biosynthesis 1	2	0.0343896						Notch signaling pathway	6	0.011109		Phosphatidylinositol signaling system	10	0.0102549						Bladder cancer	4	0.00474815		Chronic myeloid leukemia	11	0.0072265		Glycan structures - biosynthesis 1	2	0.0343896
								mTOR signaling pathway	6	0.0347353		Glioma	9	0.0160829						mTOR signaling pathway	4	0.010358		T cell receptor signaling pathway	11	0.0343896
												Inositol phosphate metabolism	8	0.00546167						Inositol phosphate metabolism	4	0.010358		Renal cell carcinoma	10	0.010889
												Non-small cell lung cancer	8	0.0188734						SNARE interactions in vesicular transport	3	0.0424257		Neuroactive ligand-receptor interaction	8	0.0502874
												Type II diabetes mellitus	7	0.0066709						Keratan sulfate biosynthesis	2	0.0330412		Chondroitin sulfate biosynthesis	5	0.00737249
												Amyotrophic lateral sclerosis (ALS)	6	3.94688e-05
												Arginine and proline metabolism	6	0.0196437
												Glutamate metabolism	5	0.0459593
												O-Glycan biosynthesis	5	0.0459593
												Circadian rhythm	4	0.00196945
												Glycosphingolipid biosynthesis - neo-lactoseries	4	0.0473589
												D-Glutamine and D-glutamate metabolism	2	0.0096577
